# Supplementary material for: Synthesis of Xylyl-Linked Bis-Benzimidazolium Salts and Their Application in the Palladium-Catalyzed Suzuki–Miyaura Cross-Coupling Reaction of Aryl Chlorides
Source: MDPI journal article supplement (doi:10.3390/catal11070817), 2021-07-05
Supplement: s1 [file s1]

## Supporting Information

# Synthesis of xylyl-linked bis-benzimidazolium salts and their application in the palladium-catalyzed Suzuki–Miyaura cross-coupling reaction of aryl chlorides

Tsui Wang<sup>[a]</sup>, Ting-Rong Wei<sup>[a]</sup>, Shu-Jyun Huang<sup>[a]</sup>, Yu-Ting Lai<sup>[a]</sup>,

Dong-Sheng Lee<sup>\*[a]</sup> and Ta-Jung Lu<sup>[a]</sup>

<sup>[a]</sup> Department of Chemistry, National Chung Hsing University, Taichung, 402, Taiwan

Fax: 886-4-22862547; E-Mail: dslee@mail.nchu.edu.tw

## Table of Contents

|                                                                                                                                                                                          |     |
|------------------------------------------------------------------------------------------------------------------------------------------------------------------------------------------|-----|
| 1. <sup>1</sup> H and <sup>13</sup> C-NMR Spectra of 1-(2,4,6-trimethylphenyl)-1 <i>H</i> -benzimidazole ( <b>2b</b> )                                                                   |     |
| 1.1. <sup>1</sup> H and <sup>13</sup> C-NMR Spectra of 2-(2',4',6'-trimethylanilido)nitrobenzene ( <b>S1</b> )                                                                           | S2  |
| 1.2. <sup>1</sup> H and <sup>13</sup> C-NMR Spectra of <i>N</i> -(2',4',6'-trimethylphenyl)-1,2-phenylenediamine ( <b>S2</b> )                                                           | S3  |
| 1.3. <sup>1</sup> H and <sup>13</sup> C-NMR Spectra of 1-(2,4,6-trimethylphenyl)-1 <i>H</i> -benzimidazole ( <b>2b</b> )                                                                 | S4  |
| 2. <sup>1</sup> H and <sup>13</sup> C-NMR Spectra of bis-benzimidazolium salts ( <b>3</b> )                                                                                              |     |
| 2.1. <sup>1</sup> H and <sup>13</sup> C-NMR Spectra of (3,3'-(1,3-phenylenebis(methylene))bis(1-(4-methoxyphenyl)-1 <i>H</i> -benzo[d]imidazol-3-ium)) dibromide ( <b>3a</b> )           | S5  |
| 2.2. <sup>1</sup> H and <sup>13</sup> C-NMR Spectra of (3,3'-(1,3-phenylenebis(methylene))bis(1-mesityl-1 <i>H</i> -benzo[d]imidazol-3-ium)) dibromide ( <b>3b</b> )                     | S6  |
| 2.3. <sup>1</sup> H and <sup>13</sup> C-NMR Spectra of (3,3'-(pyridine-2,6-diylbis(methylene))bis(1-(4-methoxyphenyl)-1 <i>H</i> -benzo[d]imidazol-3-ium)) dibromide ( <b>3c</b> )       | S7  |
| 2.4. <sup>1</sup> H and <sup>13</sup> C-NMR Spectra of (3,3'-(pyridine-2,6-diylbis(methylene))bis(1-mesityl-1 <i>H</i> -benzo[d]imidazol-3-ium)) dibromide ( <b>3d</b> )                 | S8  |
| 2.5. <sup>1</sup> H and <sup>13</sup> C-NMR Spectra of 3,3'-([1,1'-biphenyl]-2,2'-diylbis(methylene))bis(1-(4-methoxyphenyl)-1 <i>H</i> -benzo[d]imidazol-3-ium) dibromide ( <b>3e</b> ) | S9  |
| 2.6. <sup>1</sup> H and <sup>13</sup> C-NMR Spectra of 3,3'-([1,1'-biphenyl]-2,2'-diylbis(methylene))bis(1-mesityl-1 <i>H</i> -benzo[d]imidazol-3-ium) dibromide ( <b>3f</b> )           | S10 |
| 3. <sup>1</sup> H and <sup>13</sup> C-NMR Spectra of Suzuki–Miyaura Cross-Coupling Products <b>6</b>                                                                                     | S11 |

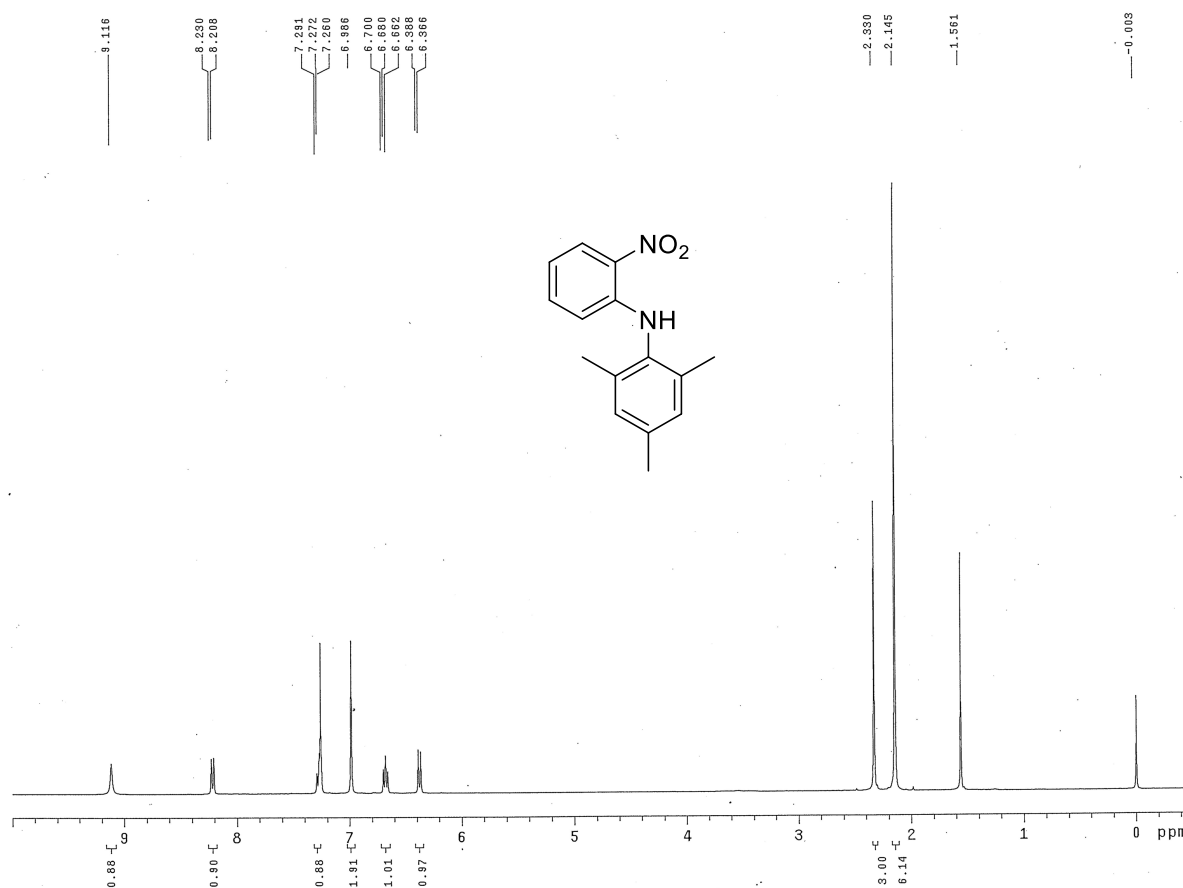

Figure S1: <sup>1</sup>H NMR spectrum of 2-(2',4',6'-trimethylanilido)nitrobenzene **S1** in CDCl<sub>3</sub>.

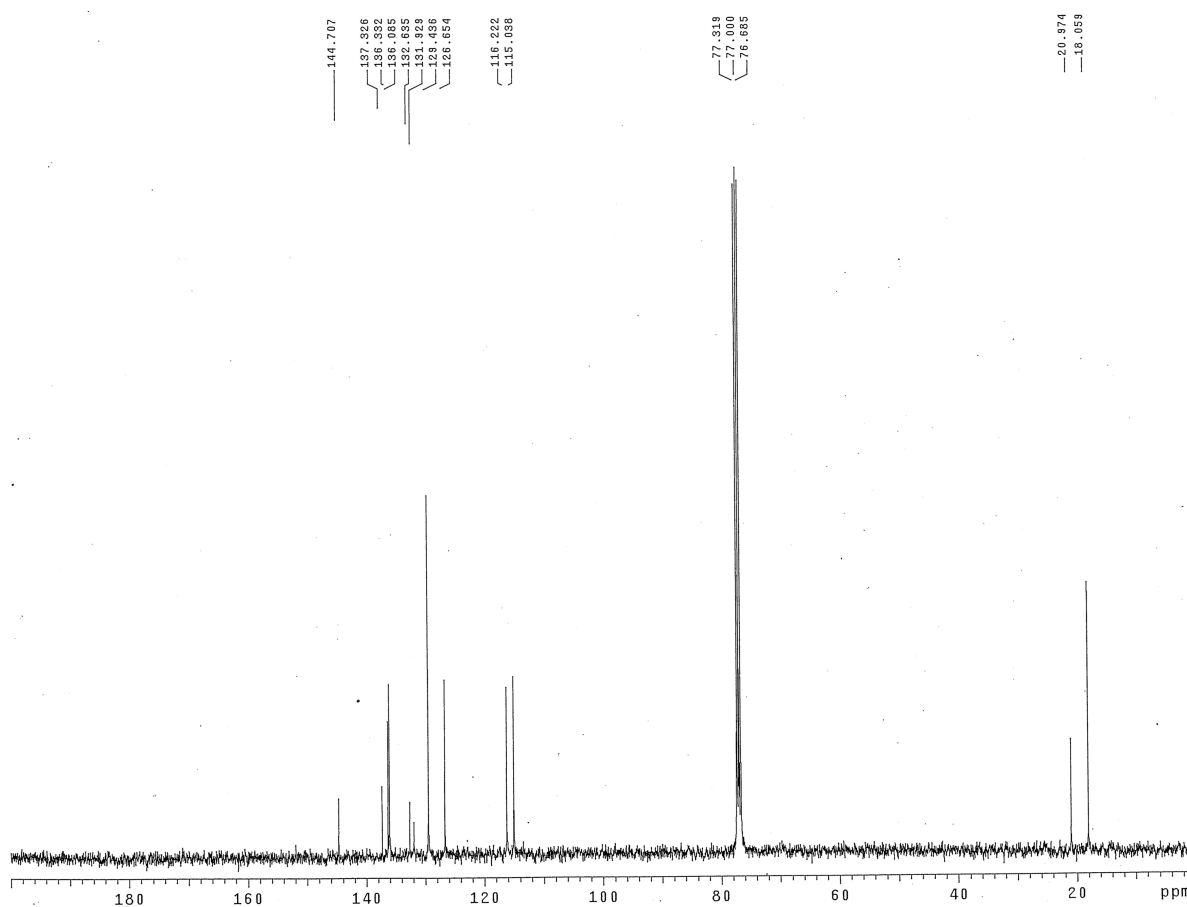

Figure S2: <sup>13</sup>C NMR spectrum of 2-(2',4',6'-trimethylanilido)nitrobenzene **S1** in CDCl<sub>3</sub>.

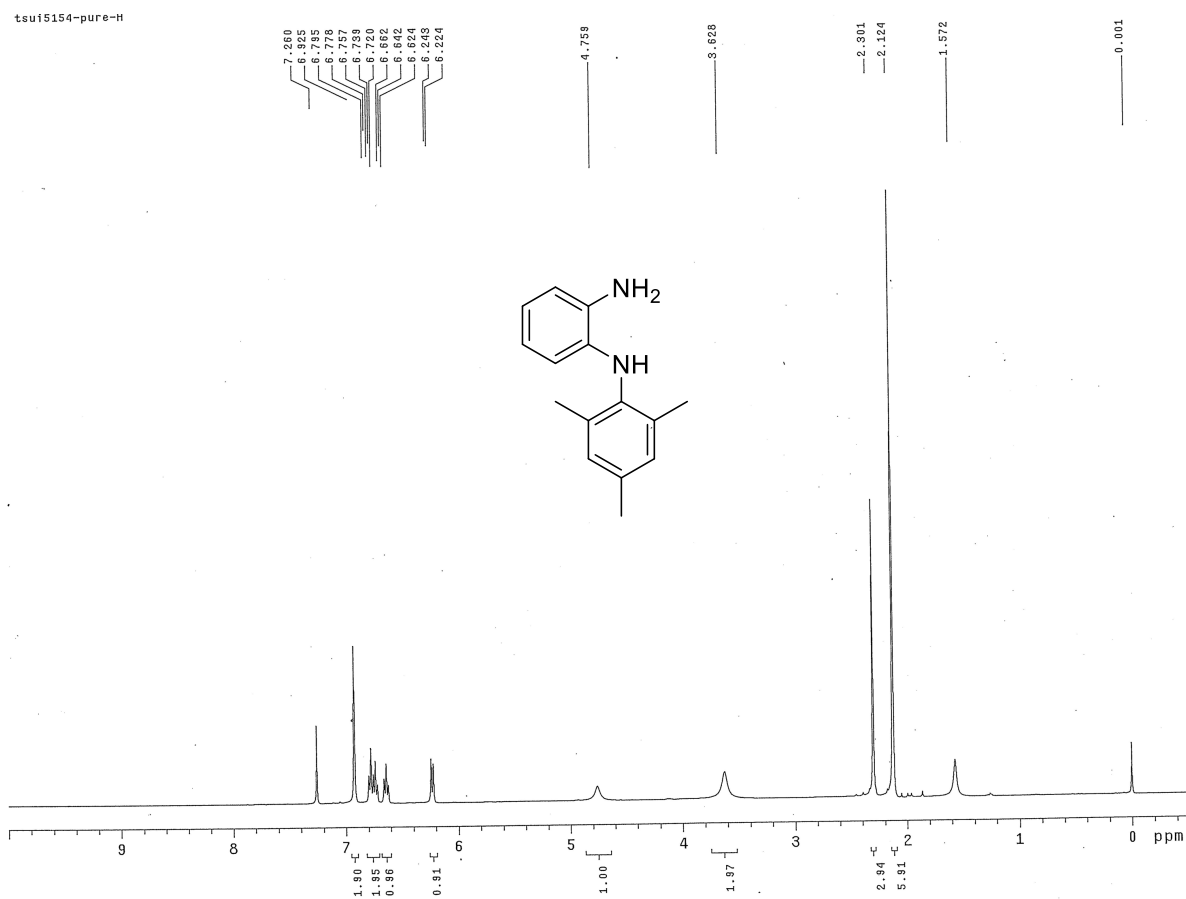

Figure S3: <sup>1</sup>H NMR spectrum of *N*-(2,4,6-trimethylphenyl)-1,2-phenylenediamine **S1** in CDCl<sub>3</sub>.

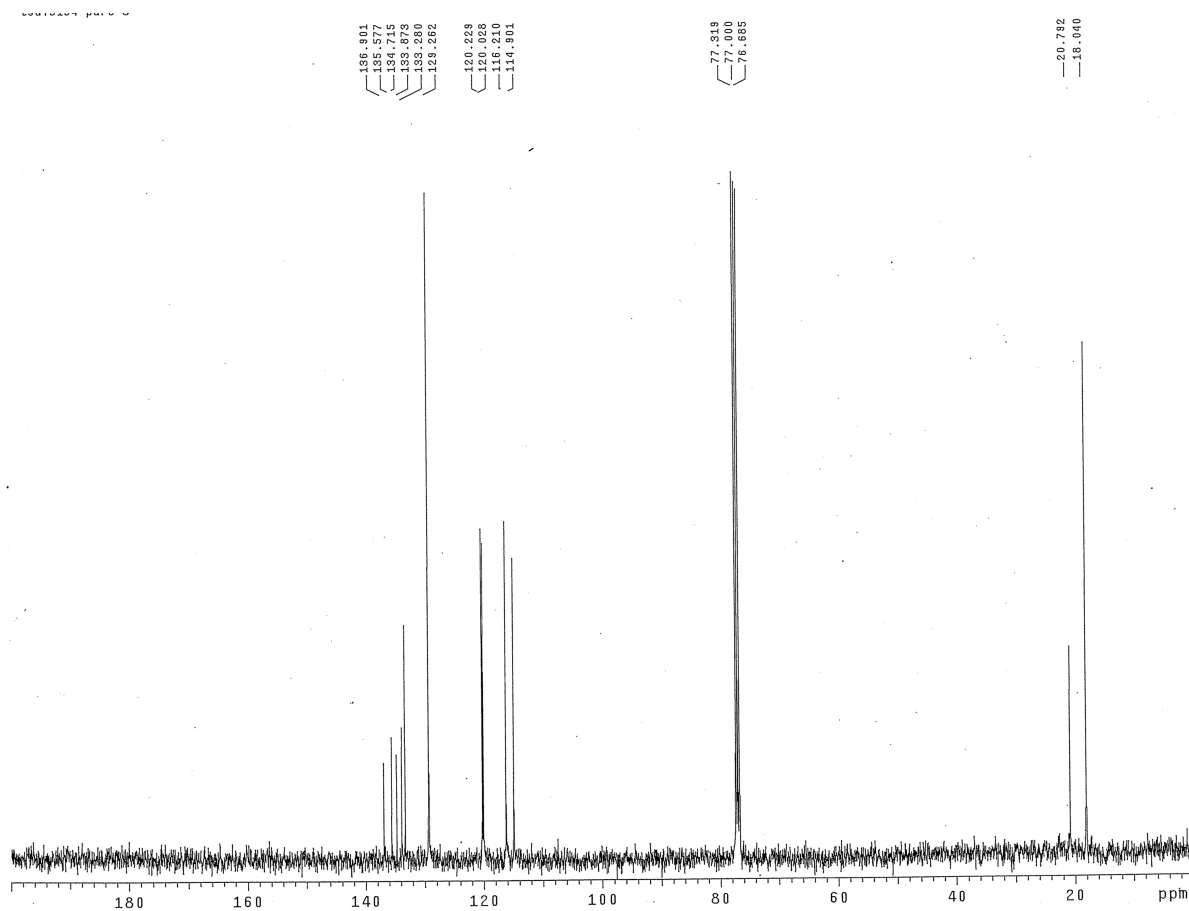

Figure S4: <sup>13</sup>C NMR spectrum of *N*-(2,4,6-trimethylphenyl)-1,2-phenylenediamine **S2** in CDCl<sub>3</sub>.

$^1\text{H}$  NMR ( $\text{CDCl}_3$ , 400 MHz) spectrum of compound **2b**

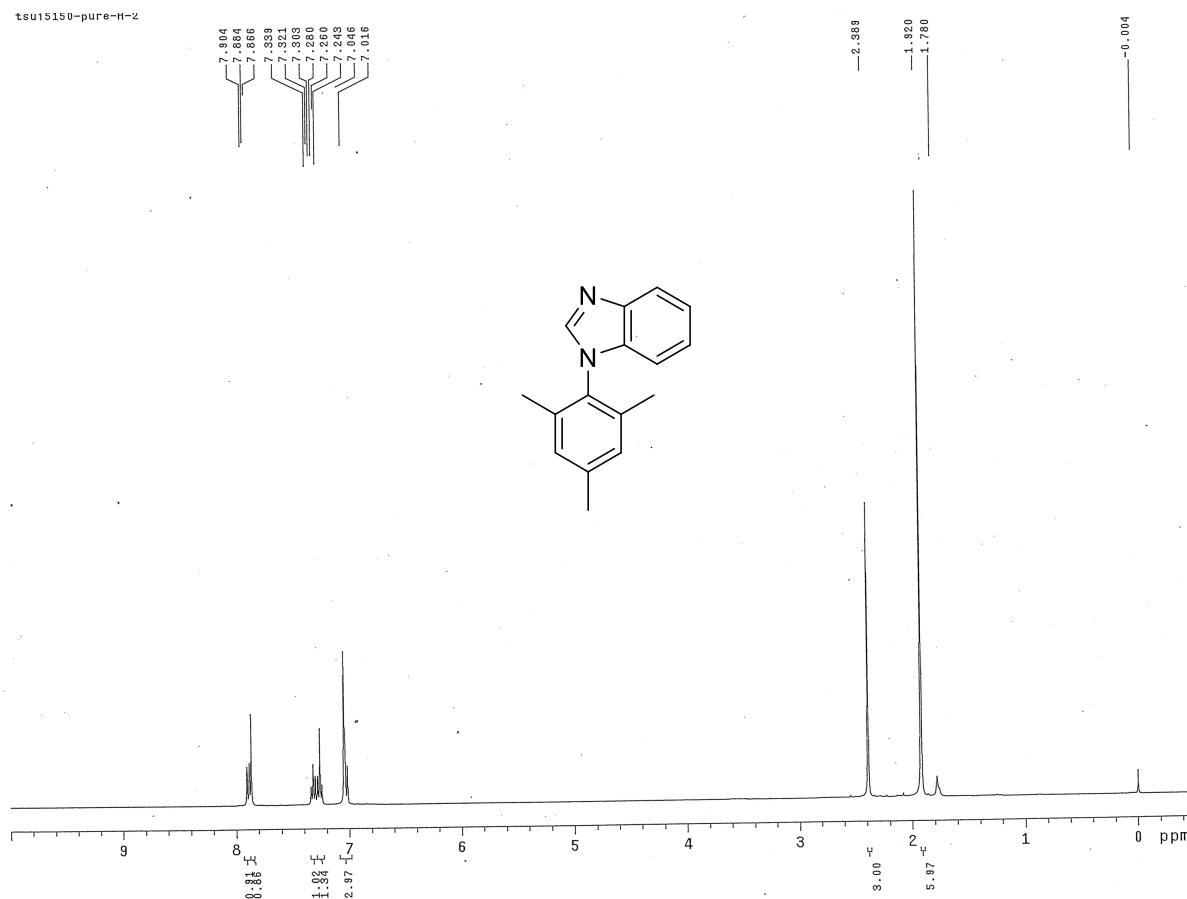

Figure S5:  $^1\text{H}$  NMR spectrum of 1-(2,4,6-trimethylphenyl)-1H-benzimidazole **2b** in  $\text{CDCl}_3$ .

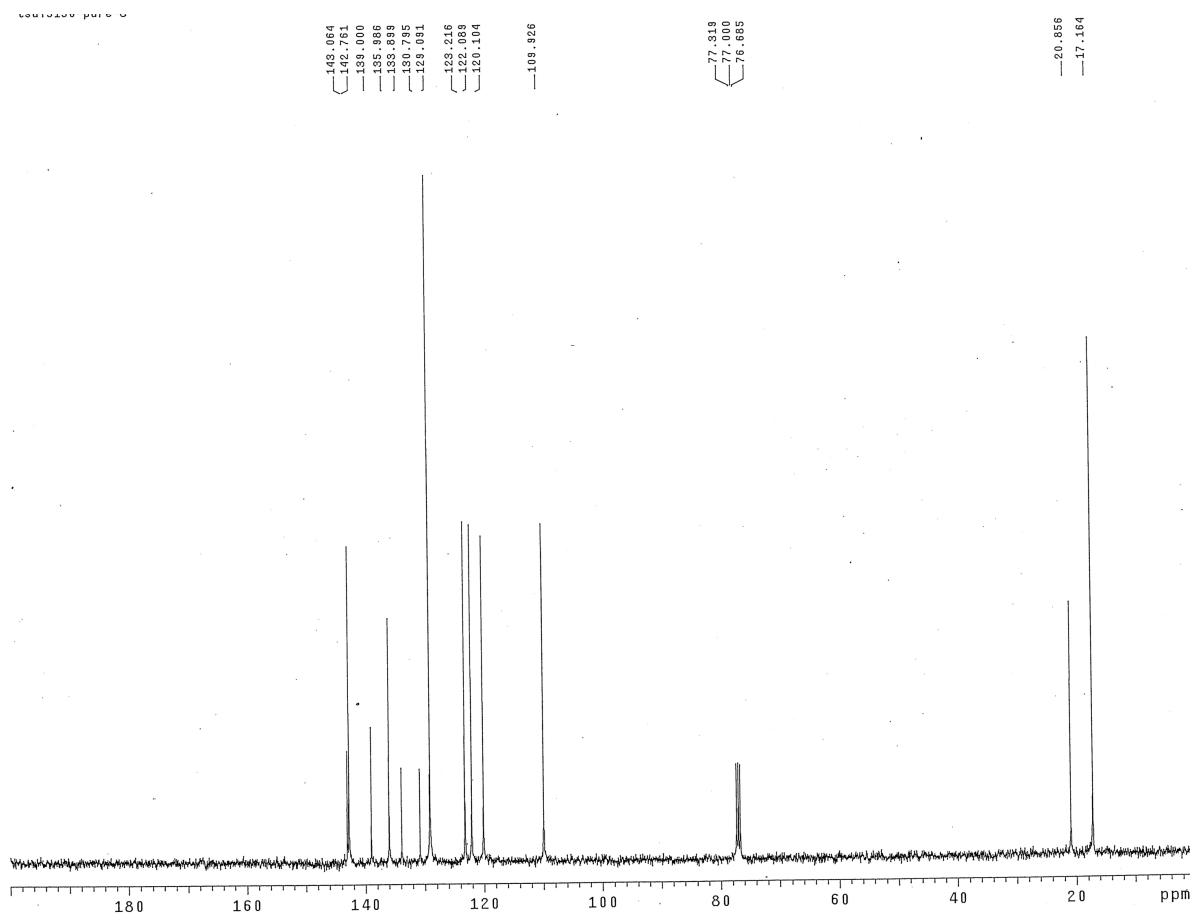

Figure S6:  $^{13}\text{C}$  NMR spectrum of 1-(2,4,6-trimethylphenyl)-1H-benzimidazole **2b** in  $\text{CDCl}_3$ .



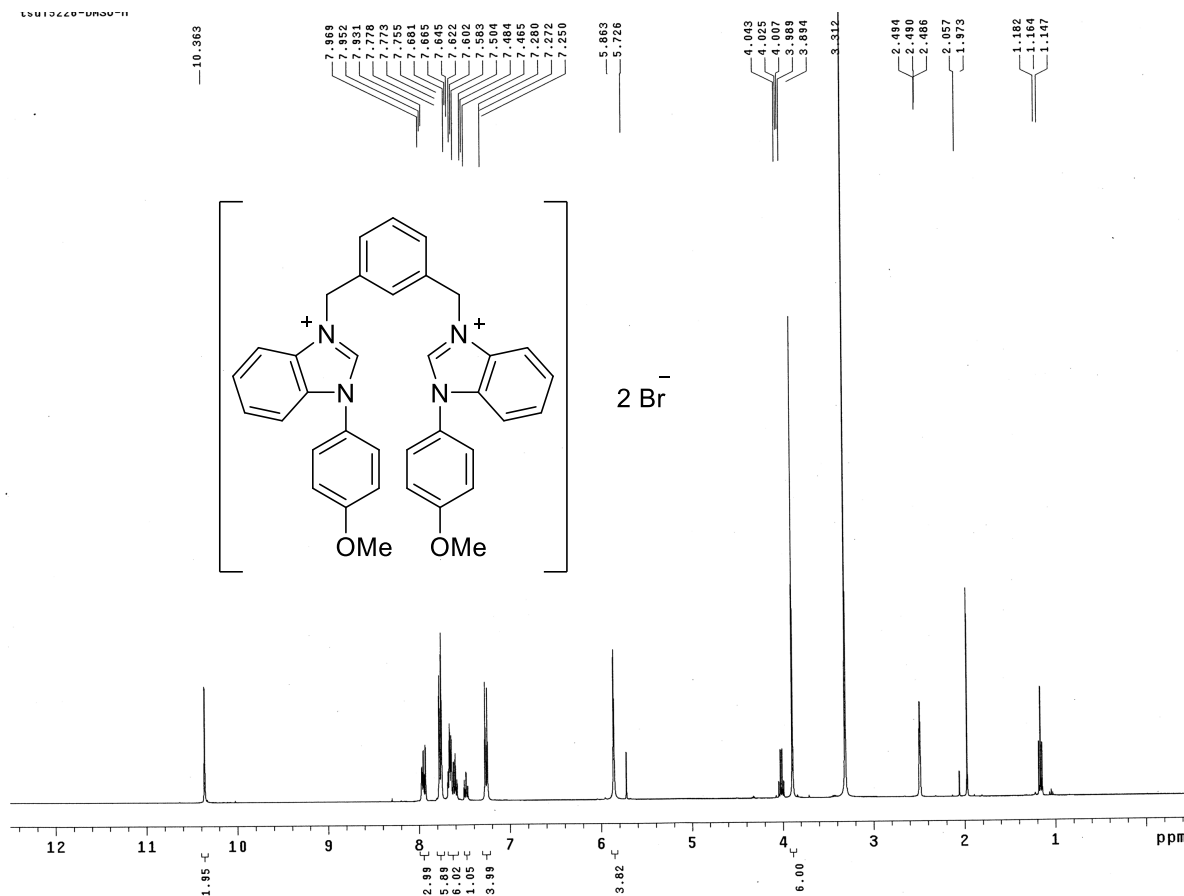

Figure S7: <sup>1</sup>H NMR spectrum of (3,3'-(1,3-phenylenebis(methylene))bis(1-(4-methoxyphenyl)-1H-benzo[d]imidazol-3-ium)) dibromide (**3a**) in DMSO-d<sub>6</sub>.

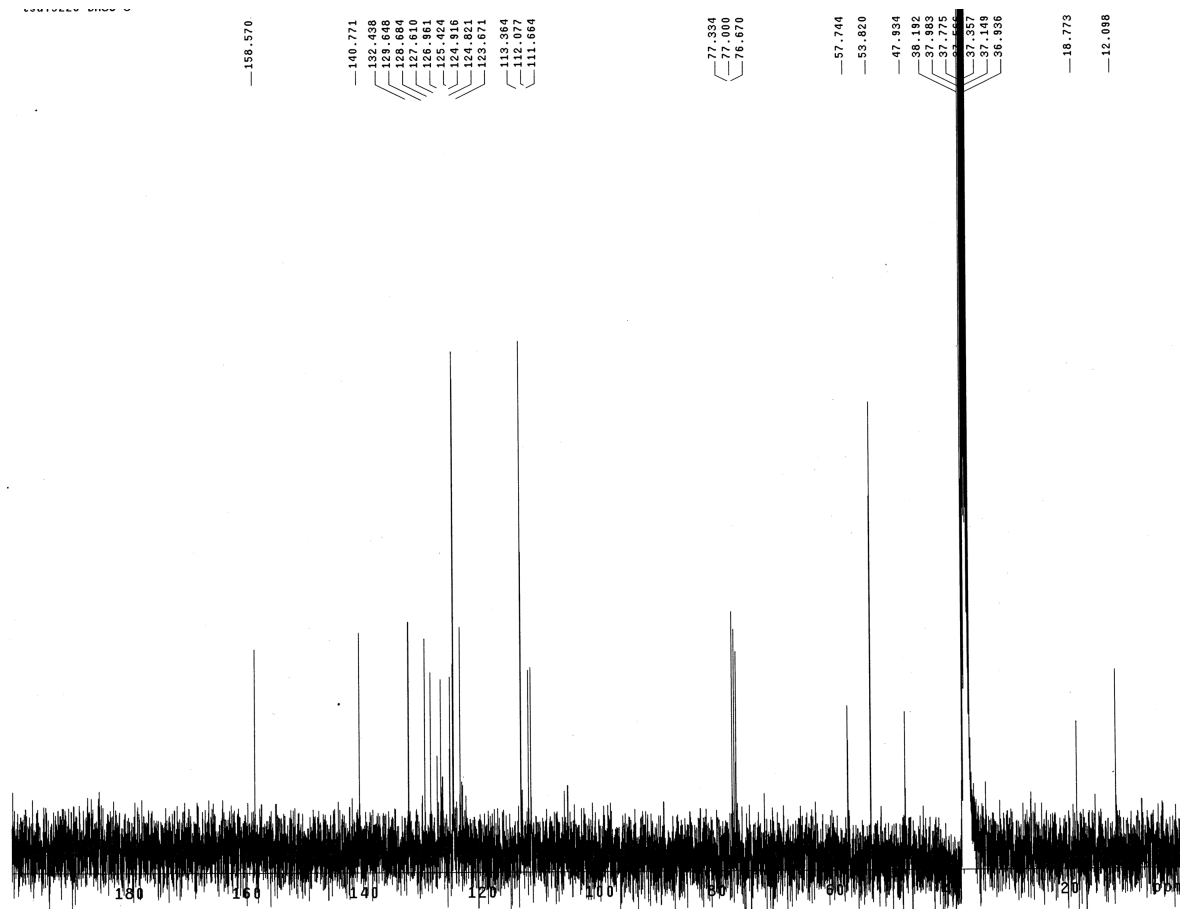

Figure S8: <sup>13</sup>C NMR spectrum of (3,3'-(1,3-phenylenebis(methylene))bis(1-(4-methoxyphenyl)-1H-benzo[d]imidazol-3-ium)) dibromide (**3a**) in DMSO-d<sub>6</sub>.

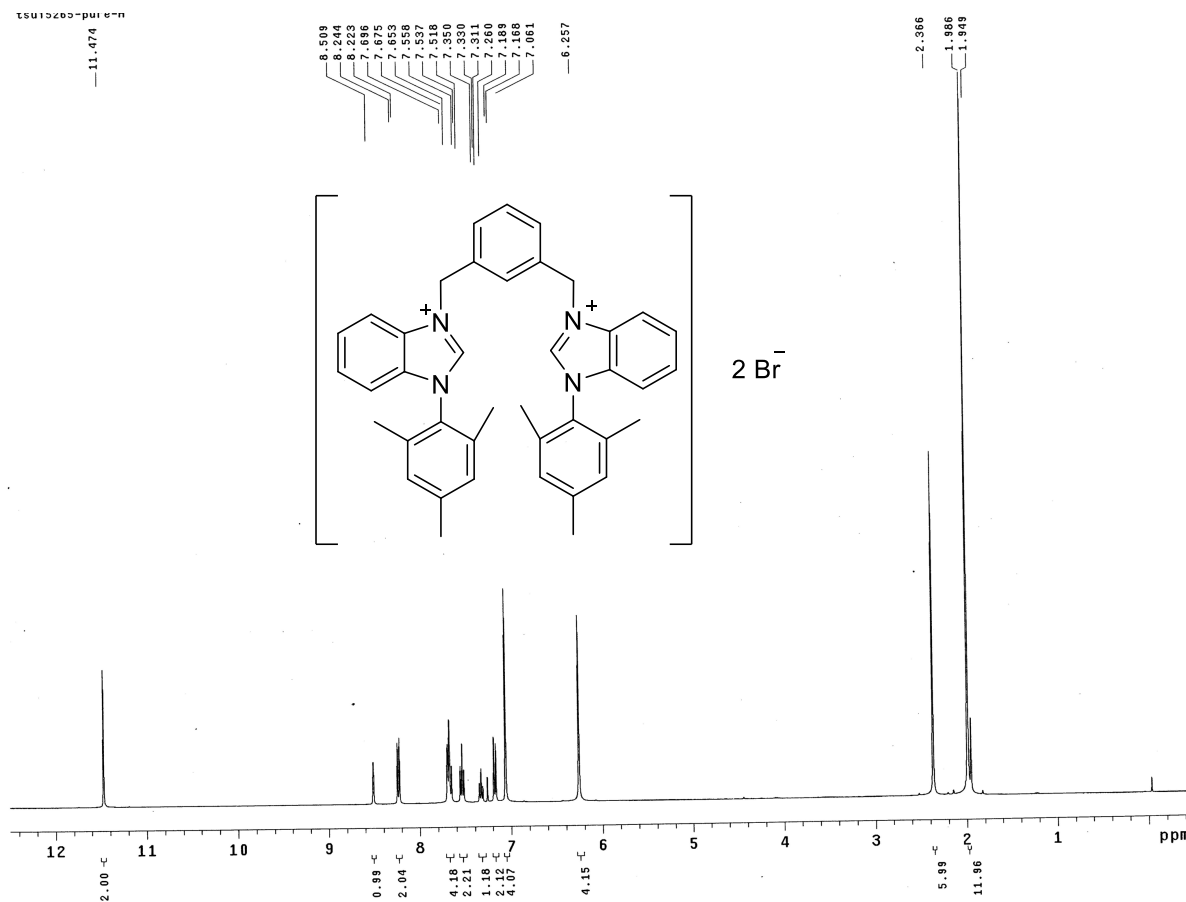

Figure S9: <sup>1</sup>H NMR spectrum of (3,3'-(1,3-phenylenebis(methylene))bis(1-mesityl-1H-benzo[d]imidazol-3-ium)) dibromide (**3b**) in CDCl<sub>3</sub>.

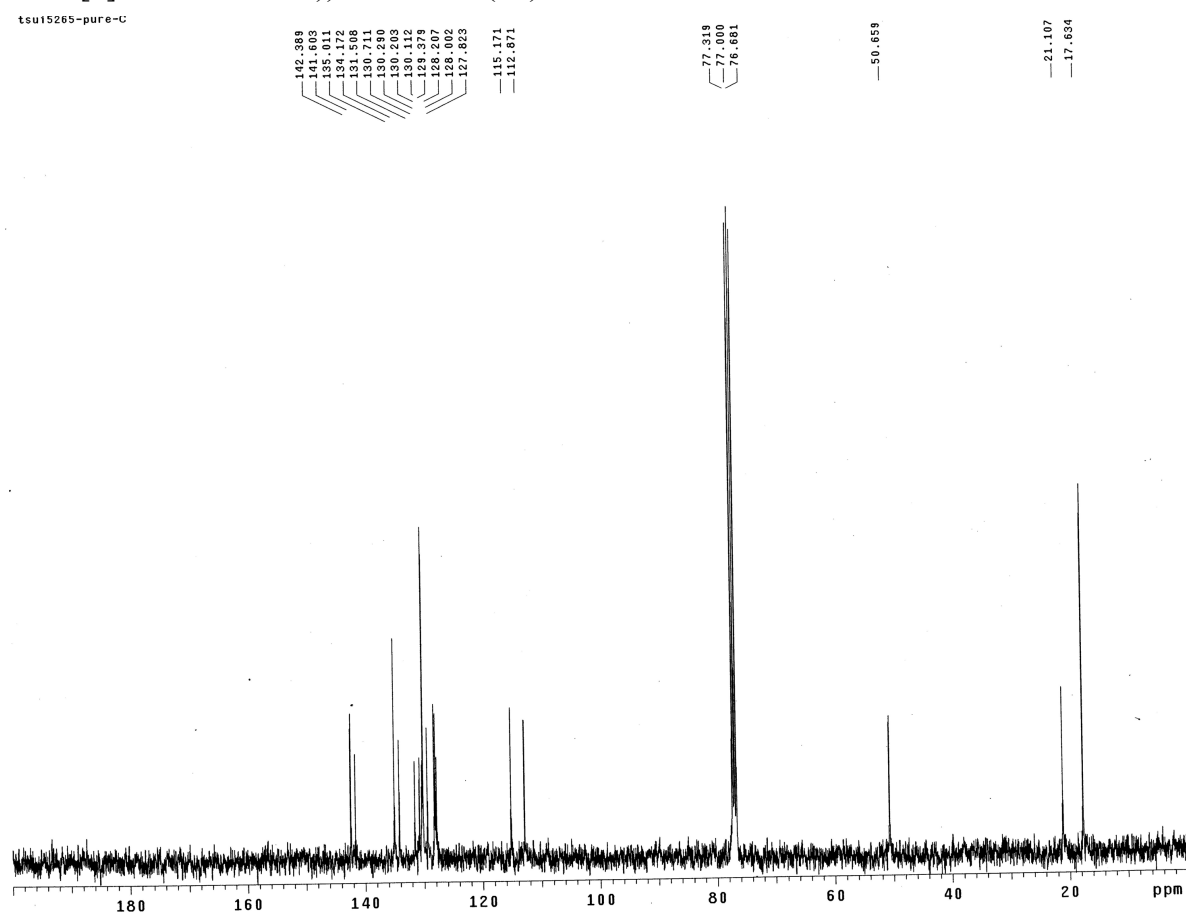

Figure S10: <sup>13</sup>C NMR spectrum of (3,3'-(1,3-phenylenebis(methylene))bis(1-mesityl-1H-benzo[d]imidazol-3-ium)) dibromide (**3b**) in CDCl<sub>3</sub>.

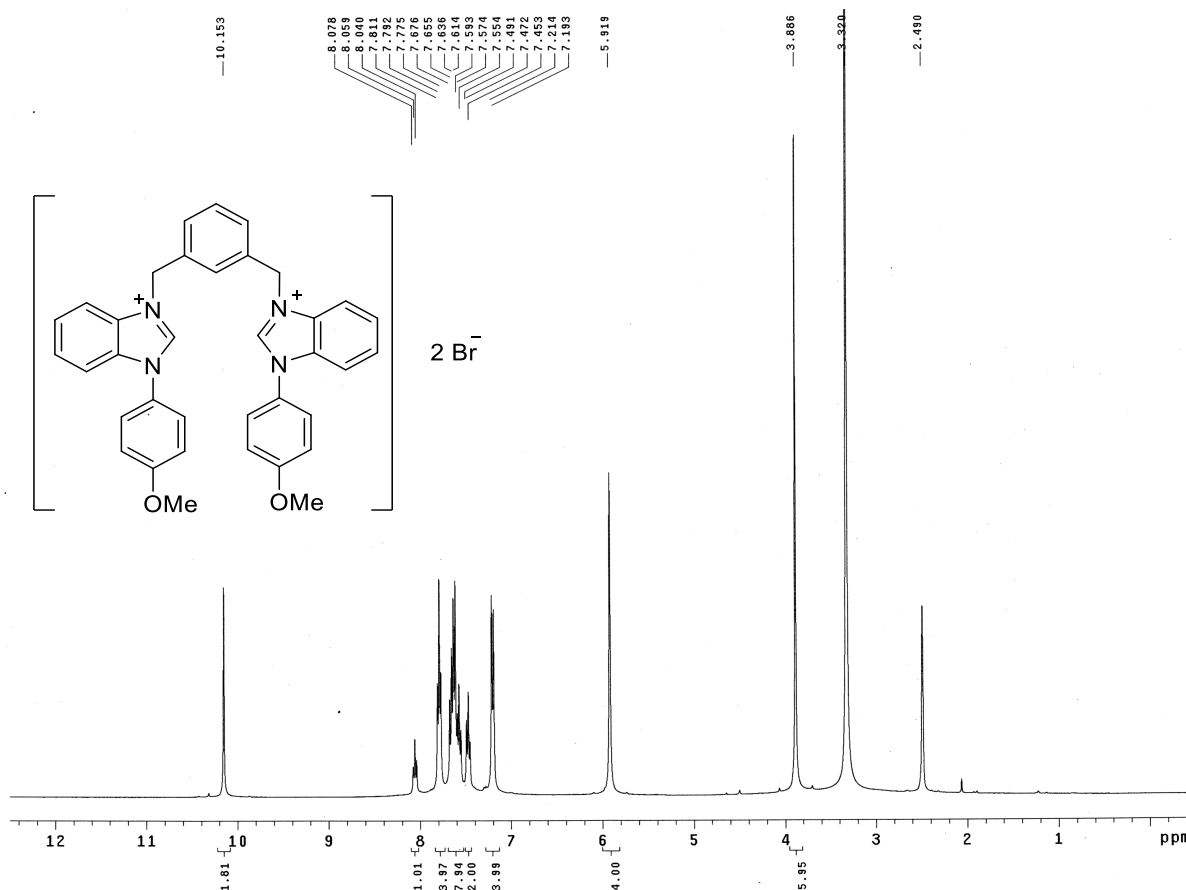

Figure S11: <sup>1</sup>H NMR spectrum of (3,3'-(pyridine-2,6-diylbis(methylene))bis(1-(4-methoxyphenyl)-1H-benzo[d]imidazol-3-ium)) dibromide (**3c**) in DMSO-d<sub>6</sub>.

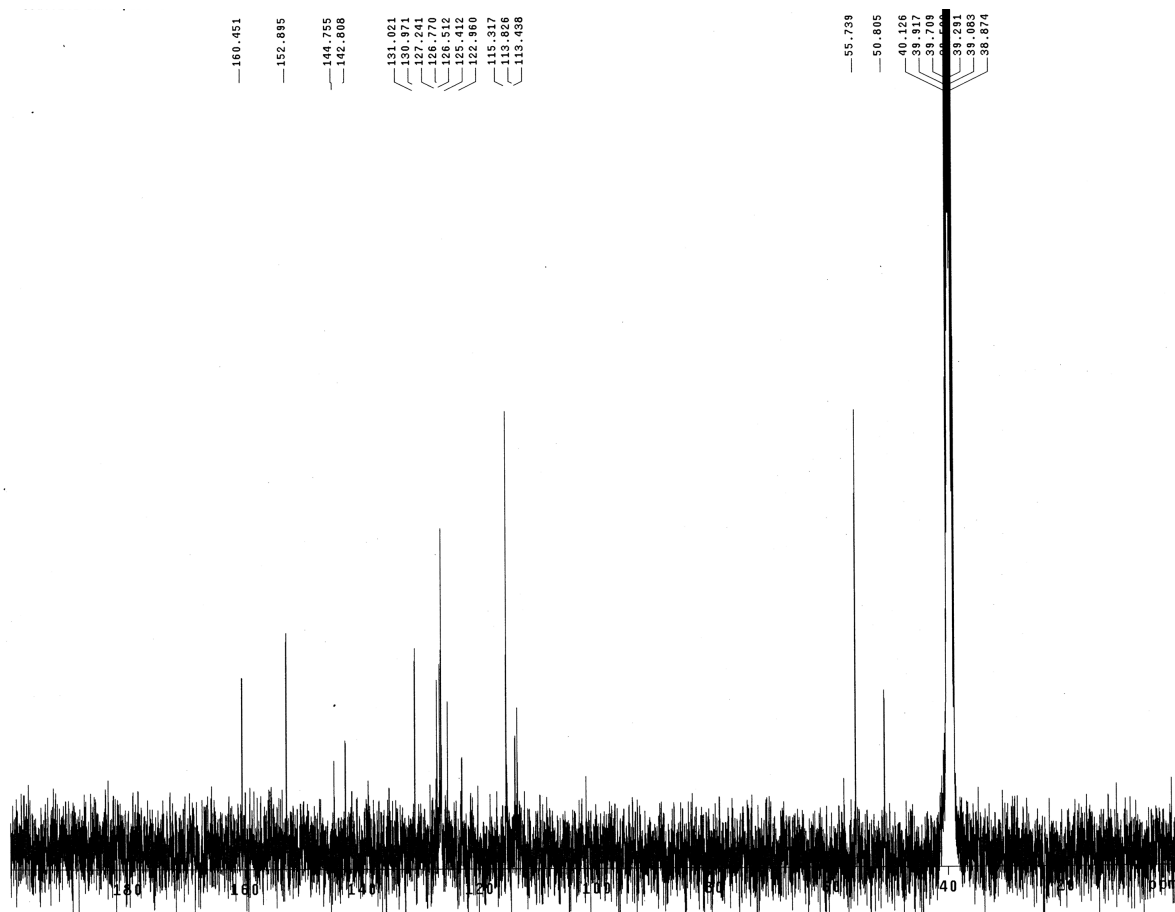

Figure S12: <sup>13</sup>C NMR spectrum of (3,3'-(pyridine-2,6-diylbis(methylene))bis(1-(4-methoxyphenyl)-1H-benzo[d]imidazol-3-ium)) dibromide (**3c**) in DMSO-d<sub>6</sub>.

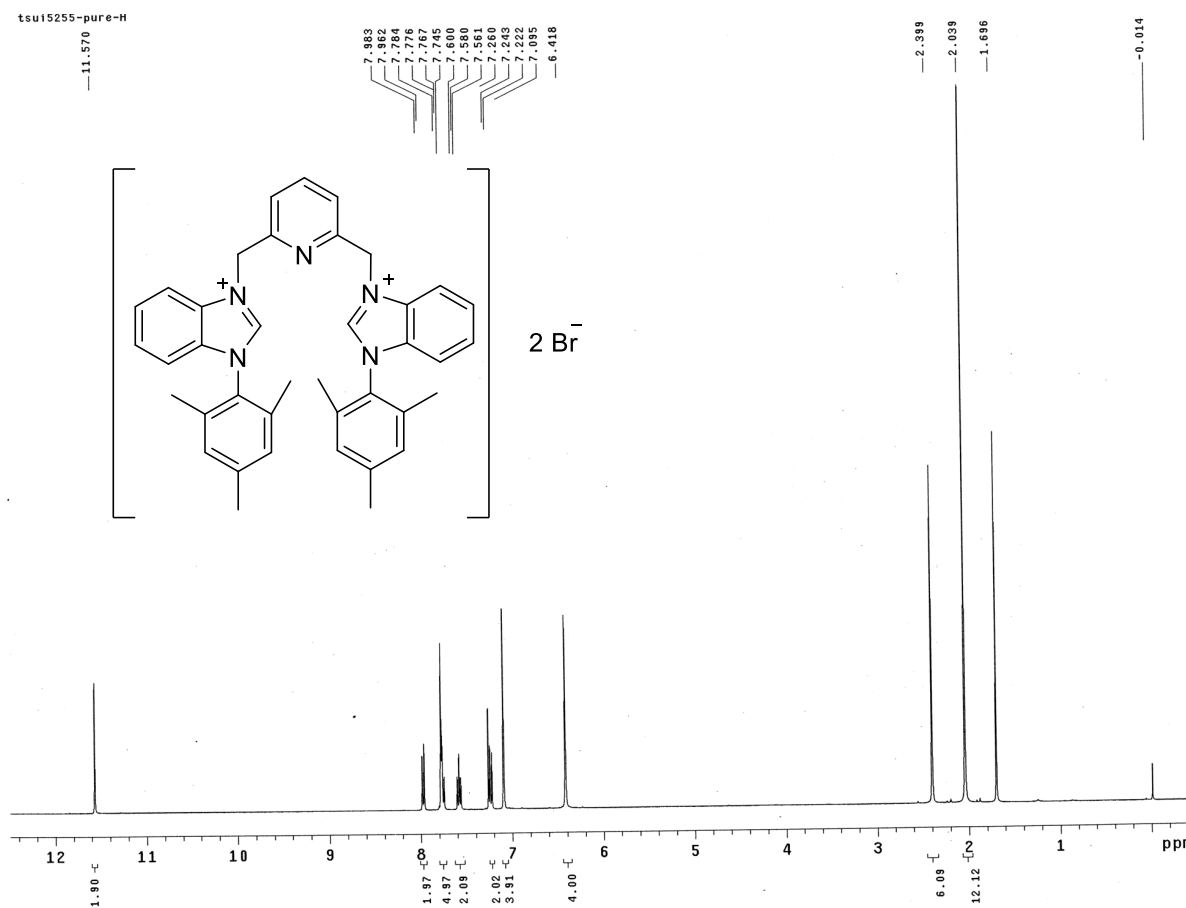

Figure S13:  $^1\text{H}$  NMR spectrum of (3,3'-(pyridine-2,6-diylbis(methylene))bis(1-mesityl-1H-benzo[d]imidazol-3-ium)) dibromide (**3d**) in CDCl<sub>3</sub>.

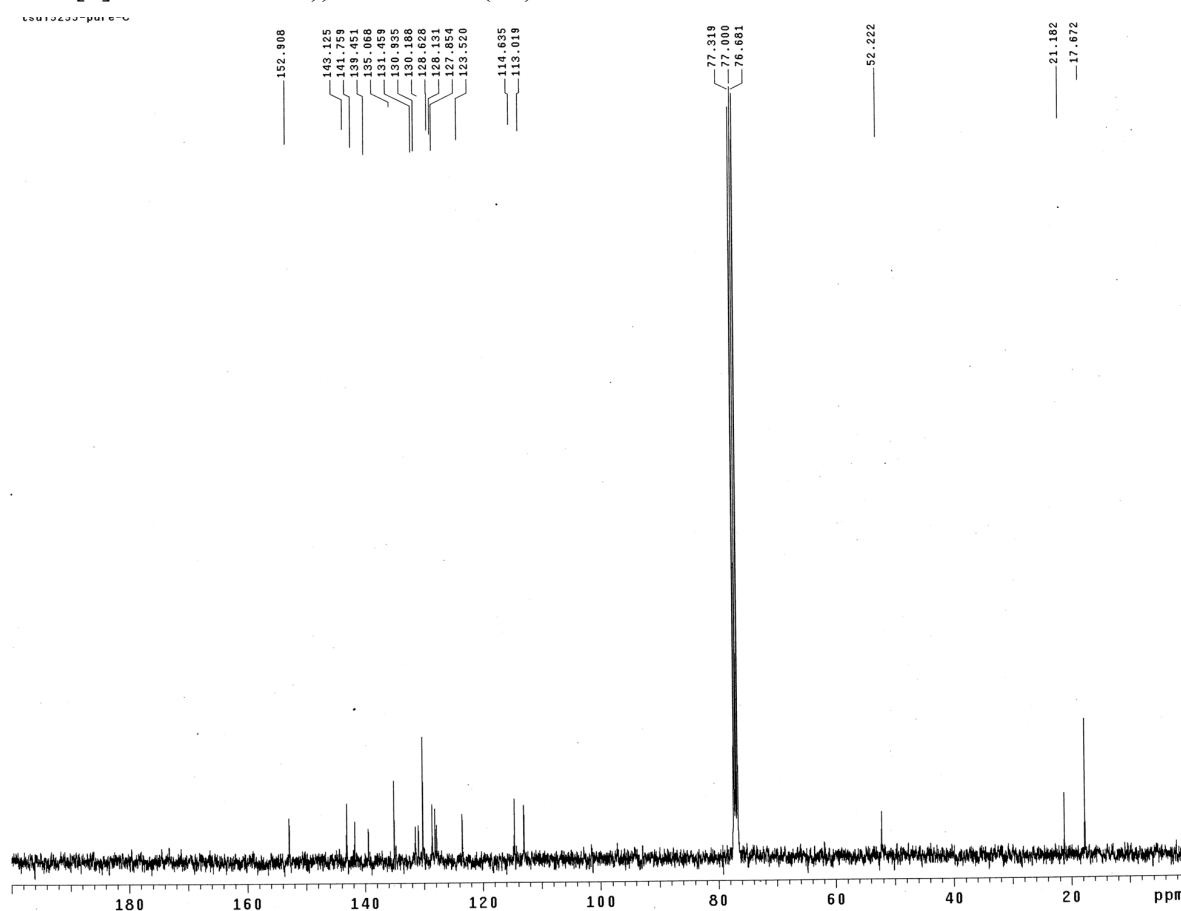

Figure S14:  $^{13}\text{C}$  NMR spectrum of (3,3'-(pyridine-2,6-diylbis(methylene))bis(1-mesityl-1H-benzo[d]imidazol-3-ium)) dibromide (**3d**) in CDCl<sub>3</sub>.

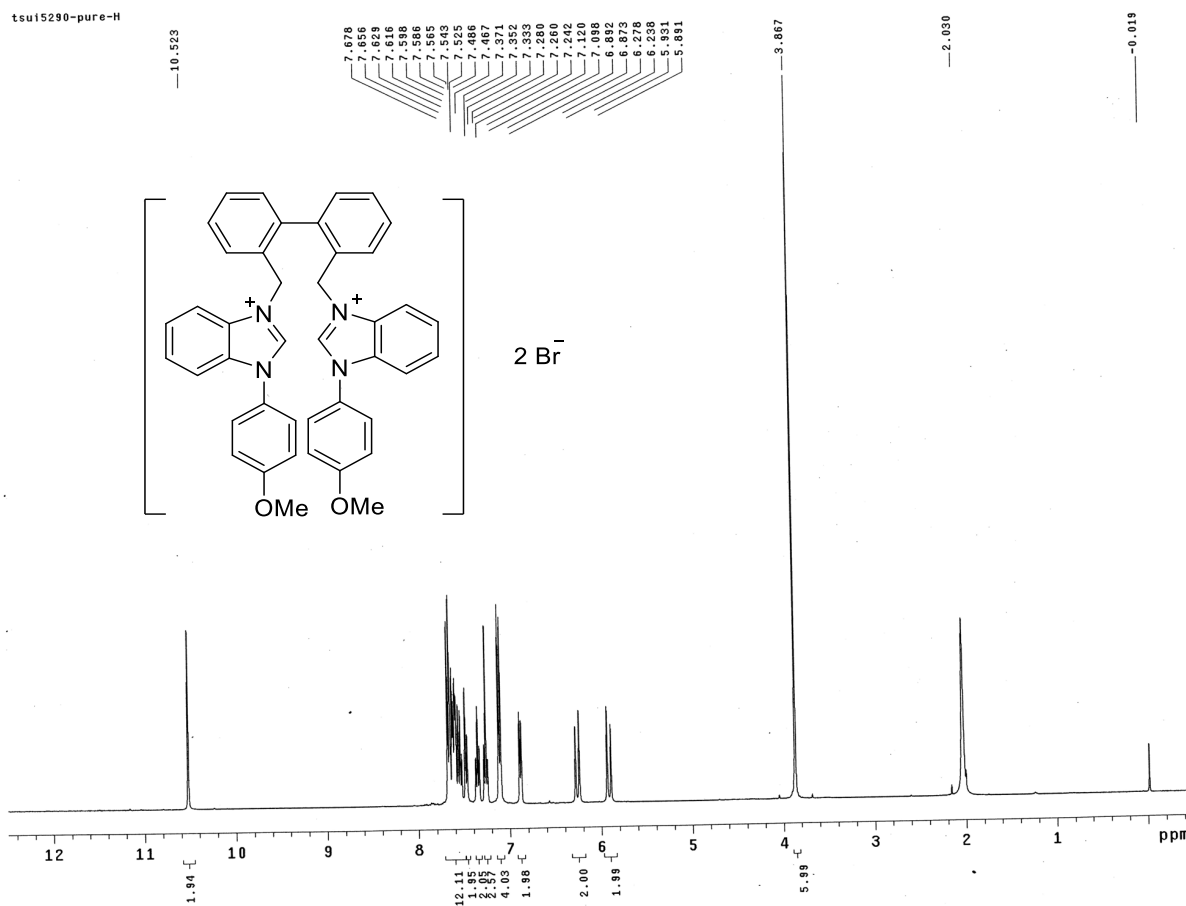

Figure S15: <sup>1</sup>H NMR spectrum of 3,3'-([1,1'-biphenyl]-2,2'-diylbis(methylene))bis(1-(4-methoxyphenyl)-1*H*-benzo[d]imidazol-3-ium) dibromide (**3e**) in CDCl<sub>3</sub>.

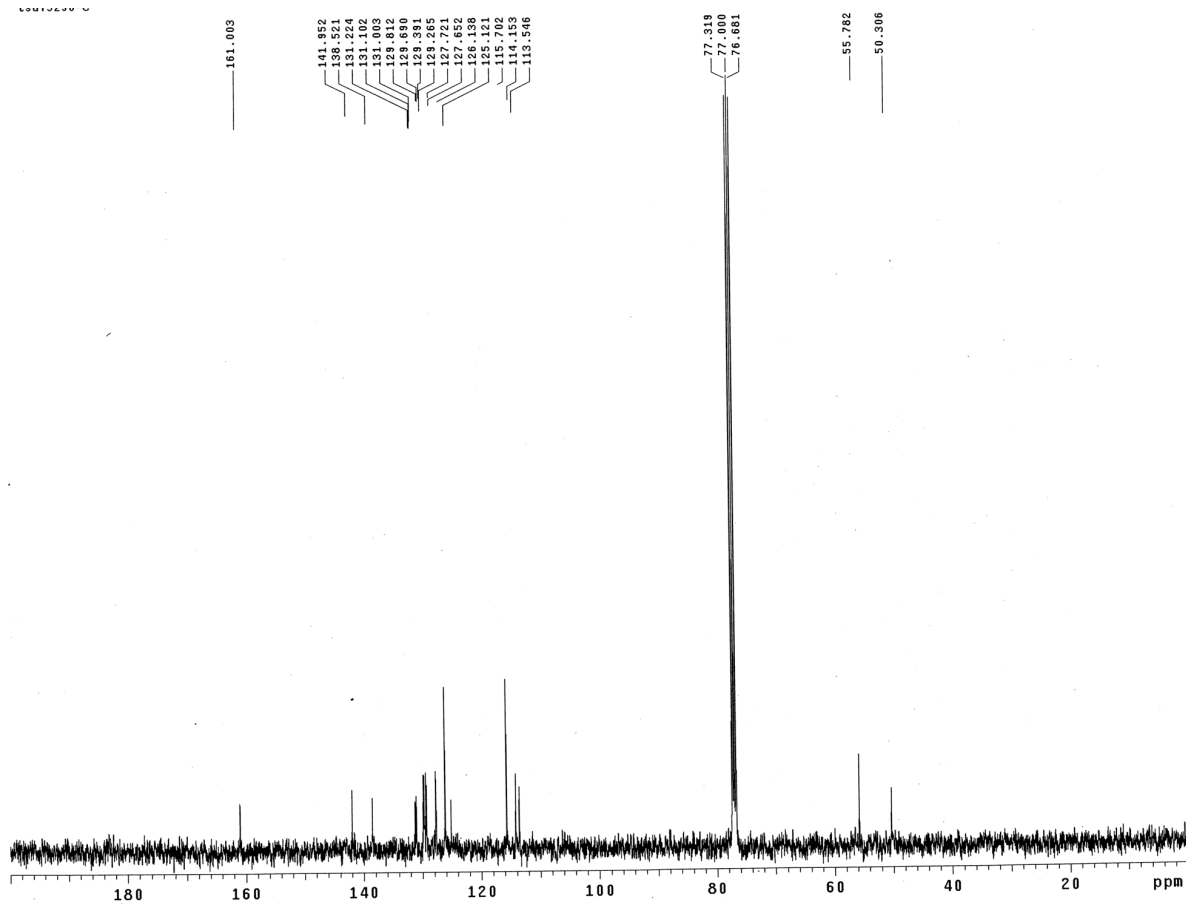

Figure S16: <sup>13</sup>C NMR spectrum of 3,3'-([1,1'-biphenyl]-2,2'-diylbis(methylene))bis(1-(4-methoxyphenyl)-1*H*-benzo[d]imidazol-3-ium) dibromide (**3e**) in CDCl<sub>3</sub>.



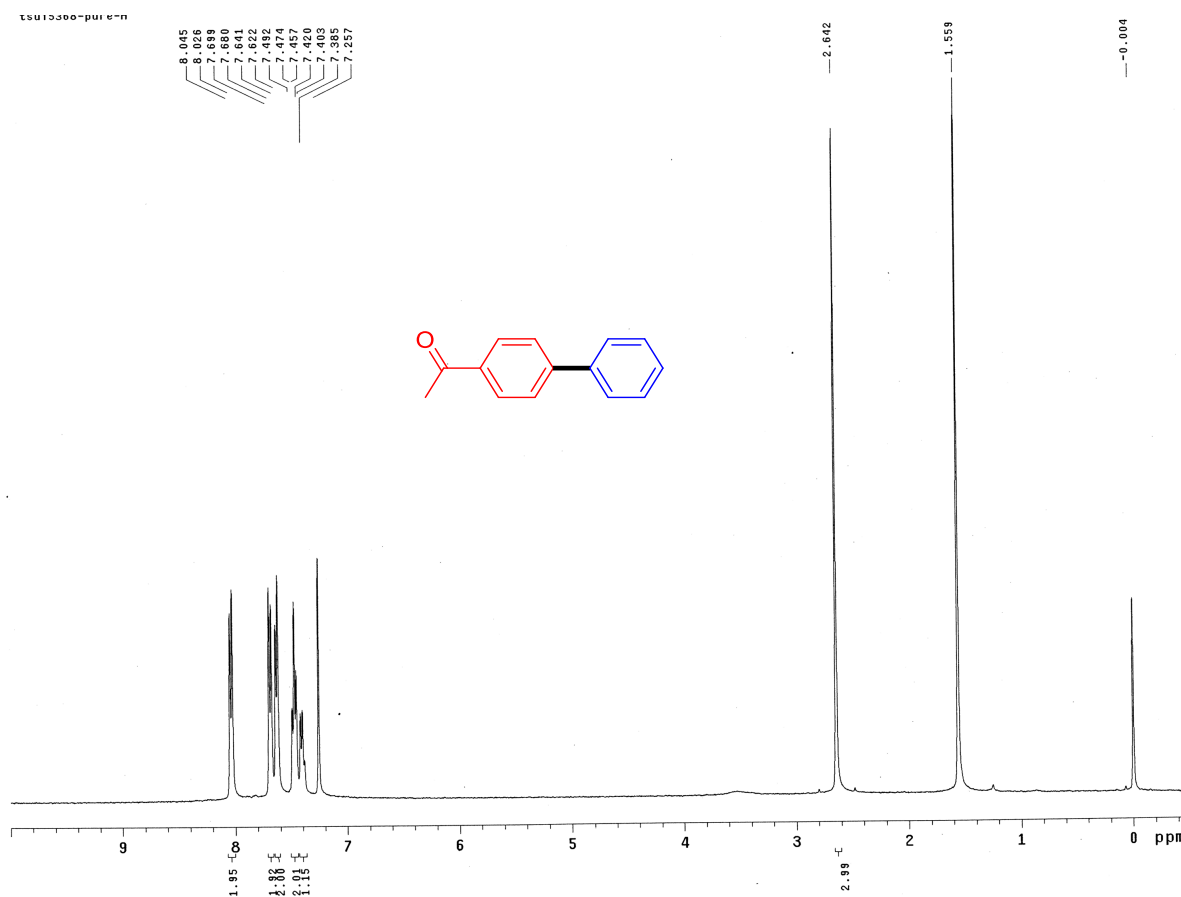

Figure S19: <sup>1</sup>H NMR spectrum of 4-acetylbiphenyl (**6aa**) in CDCl<sub>3</sub>.

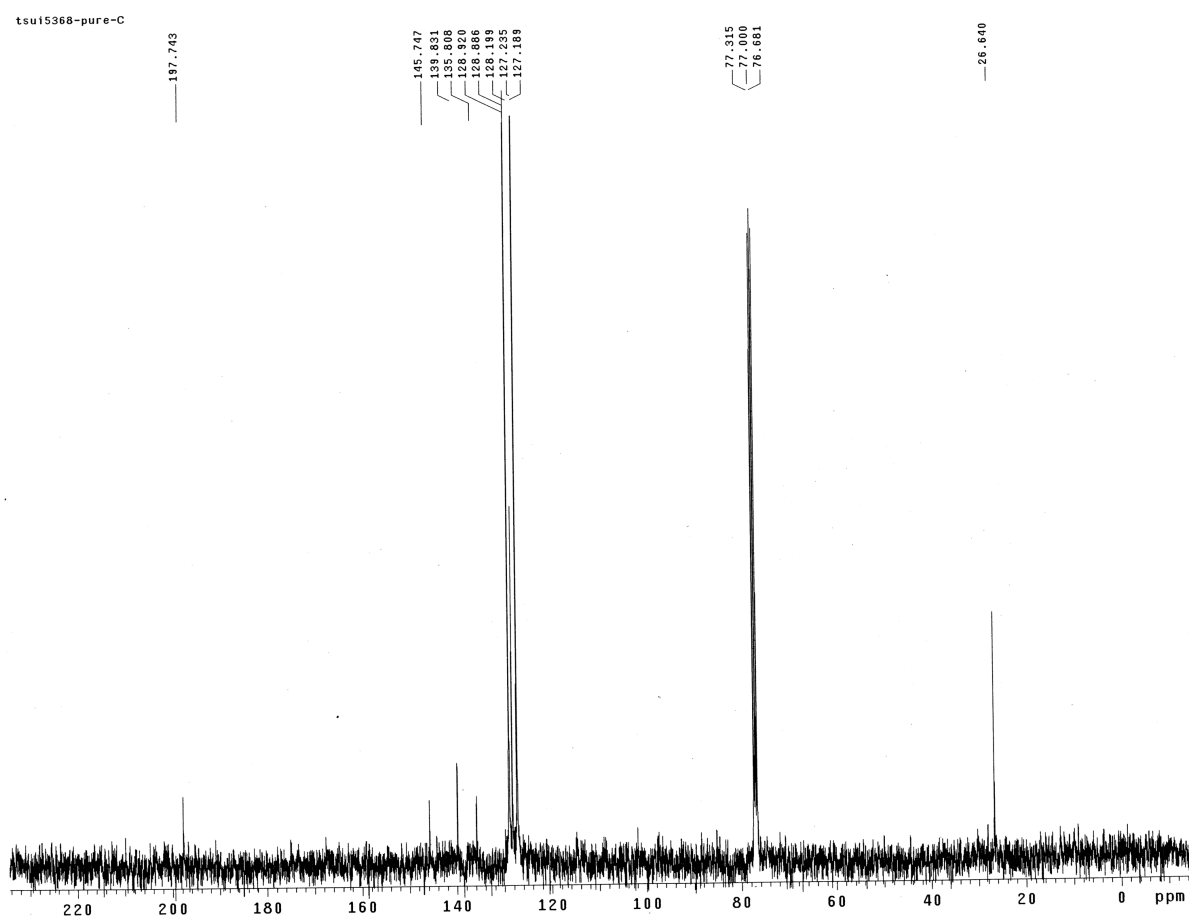

Figure S20: <sup>13</sup>C NMR spectrum of 4-acetylbiphenyl (**6aa**) in CDCl<sub>3</sub>.





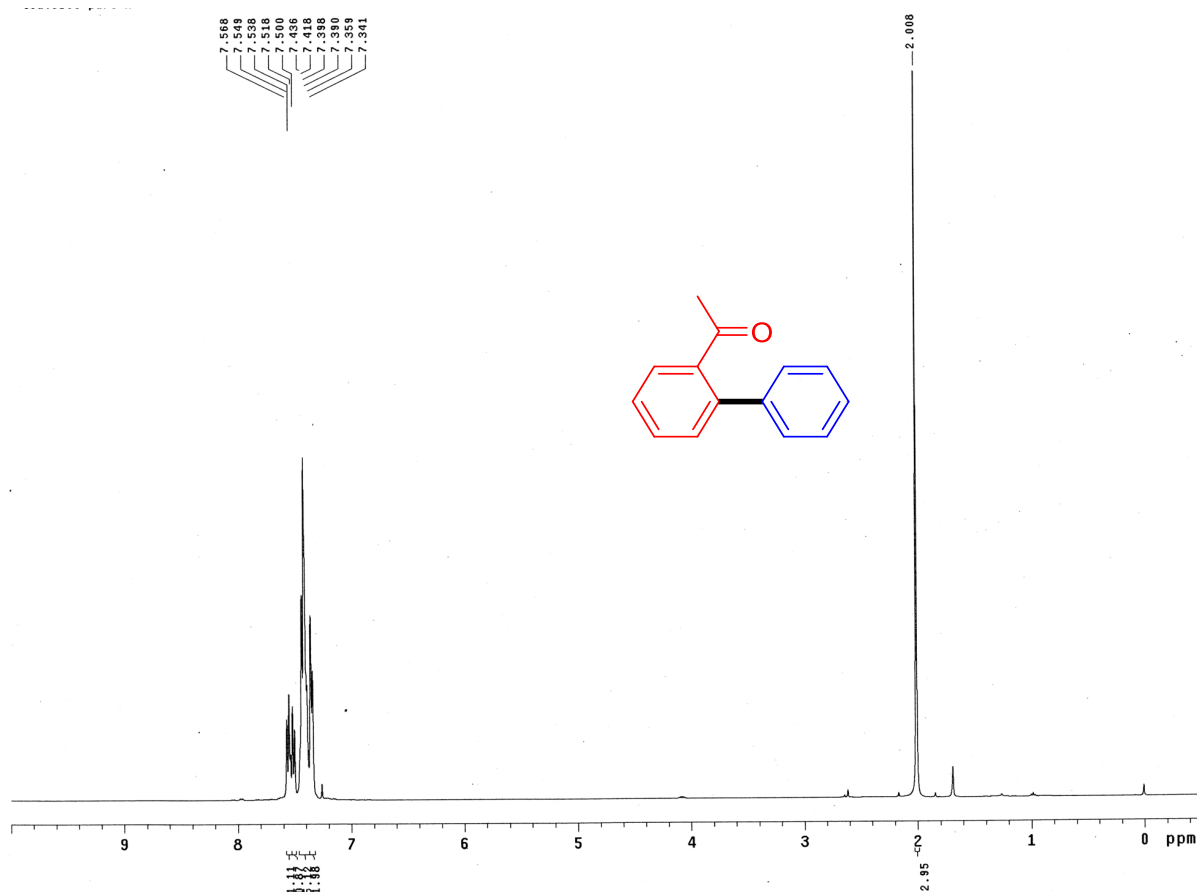

Figure S23: <sup>1</sup>H NMR spectrum of 2-acetylbiphenyl (**6ca**) in CDCl<sub>3</sub>.

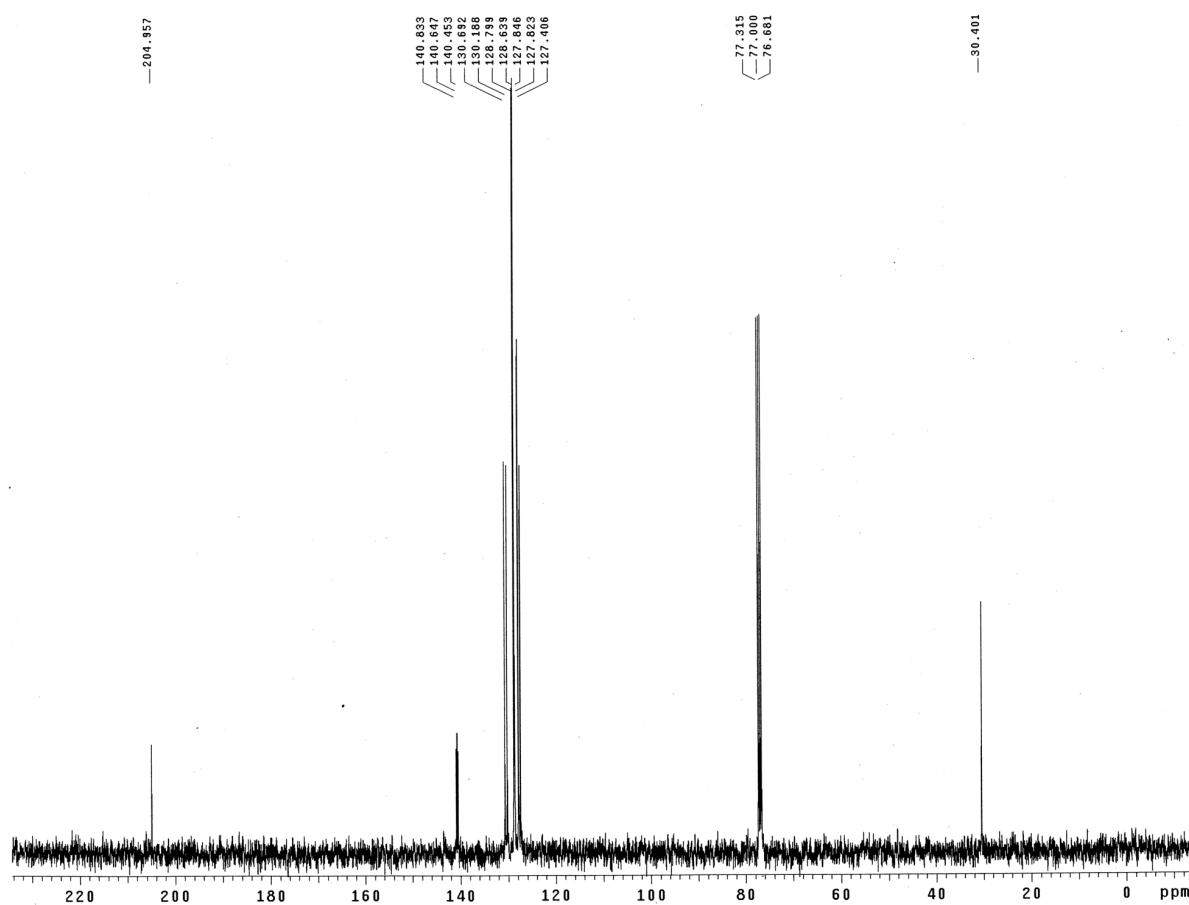

Figure S24: <sup>13</sup>C NMR spectrum of 2-acetylbiphenyl (**6ca**) in CDCl<sub>3</sub>.

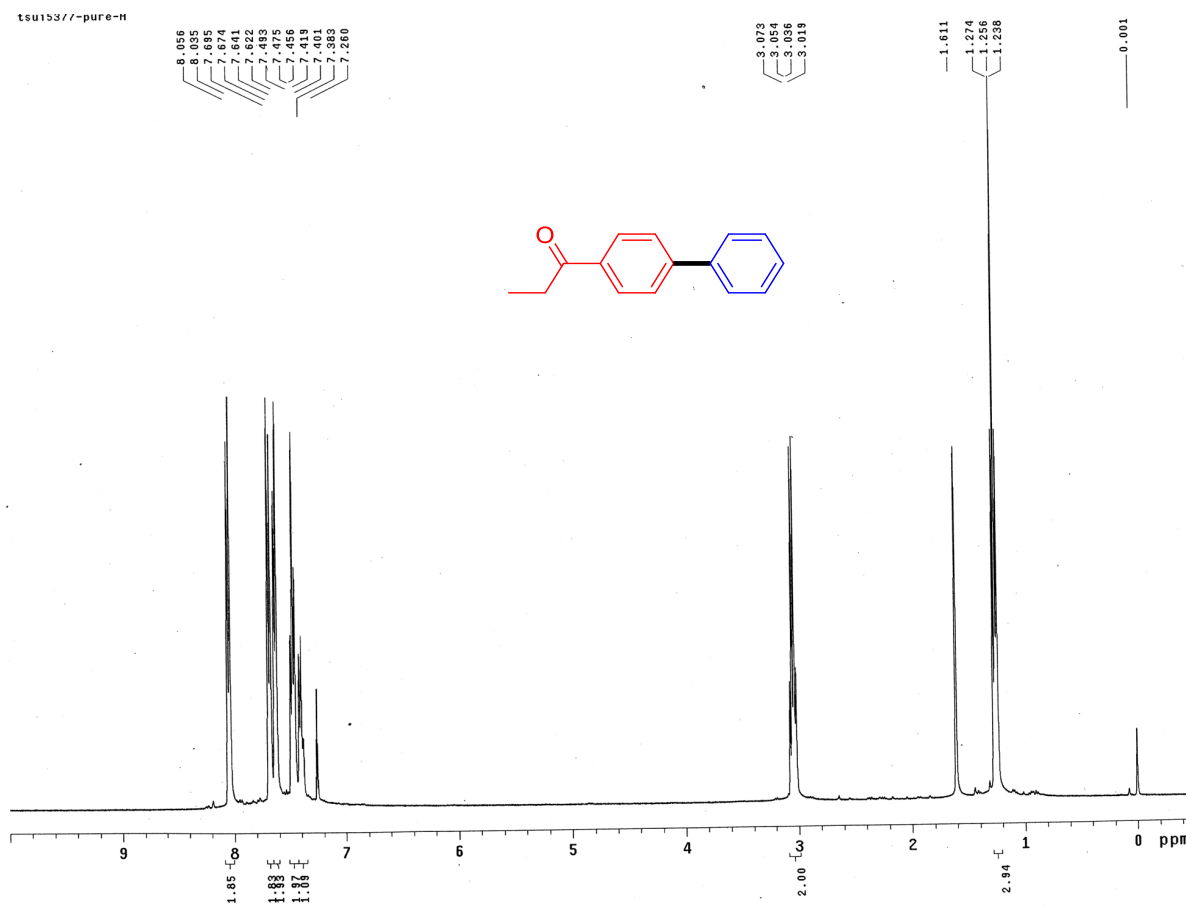

Figure S25: <sup>1</sup>H NMR spectrum of 4'-phenylpropiphenone (**6da**) in CDCl<sub>3</sub>.

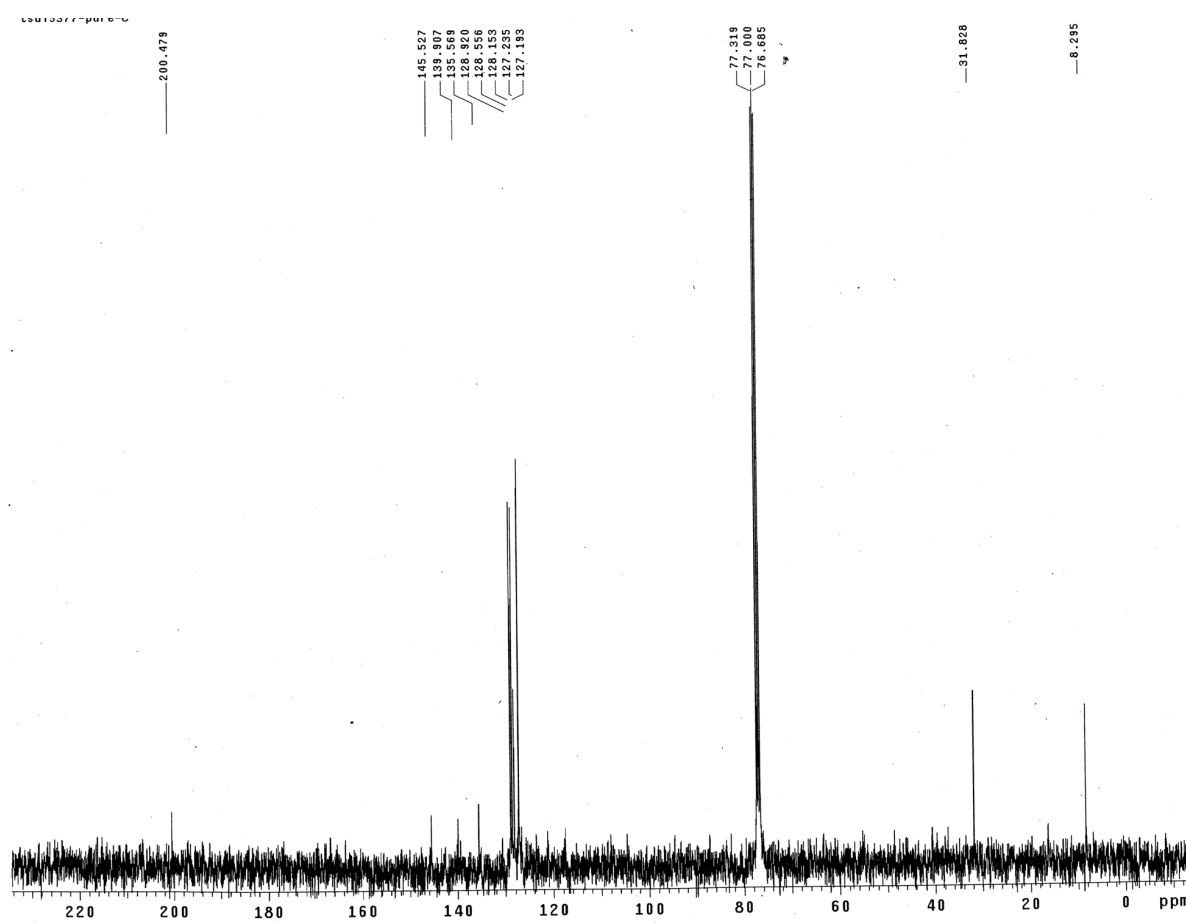

Figure S26: <sup>13</sup>C NMR spectrum of 4'-phenylpropiphenone (**6da**) in CDCl<sub>3</sub>.

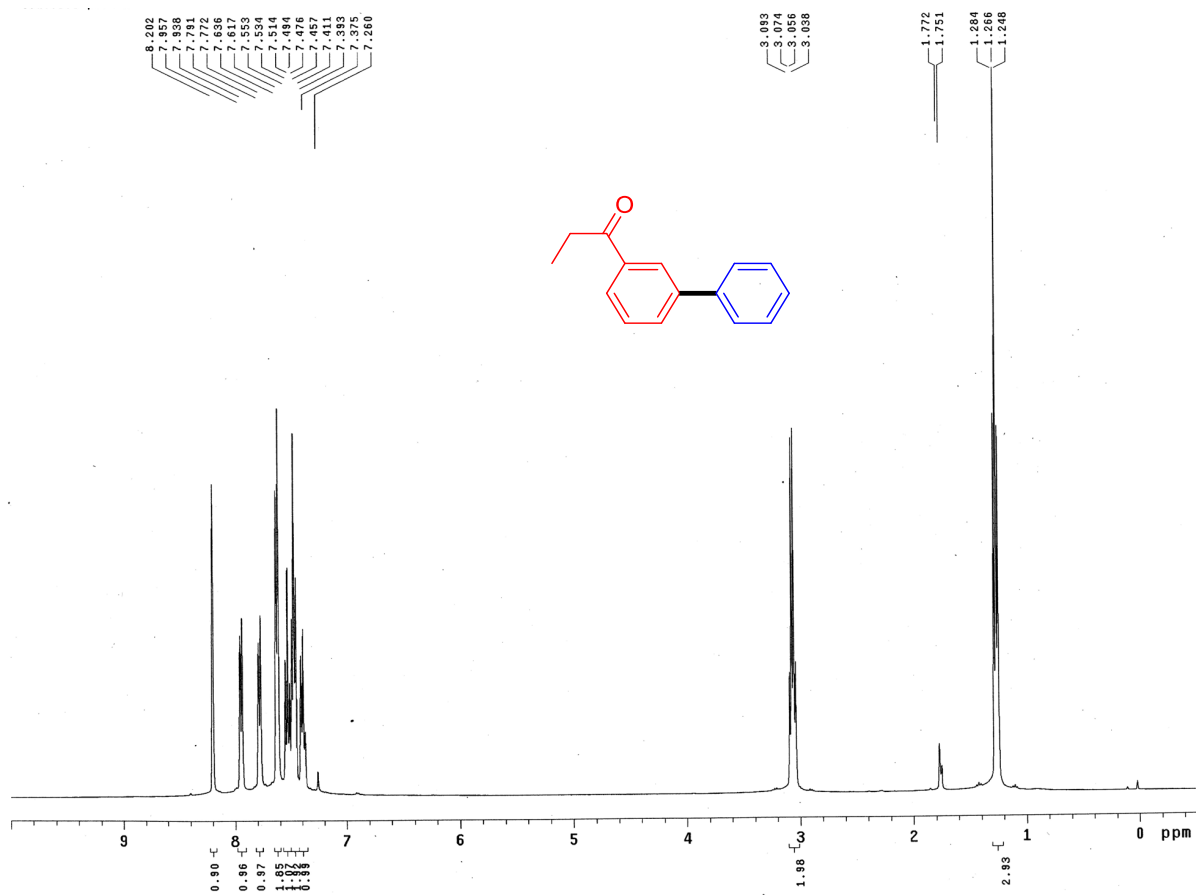

Figure S27: <sup>1</sup>H NMR spectrum of 3'-phenylpropiphenone (**6ea**) in CDCl<sub>3</sub>.

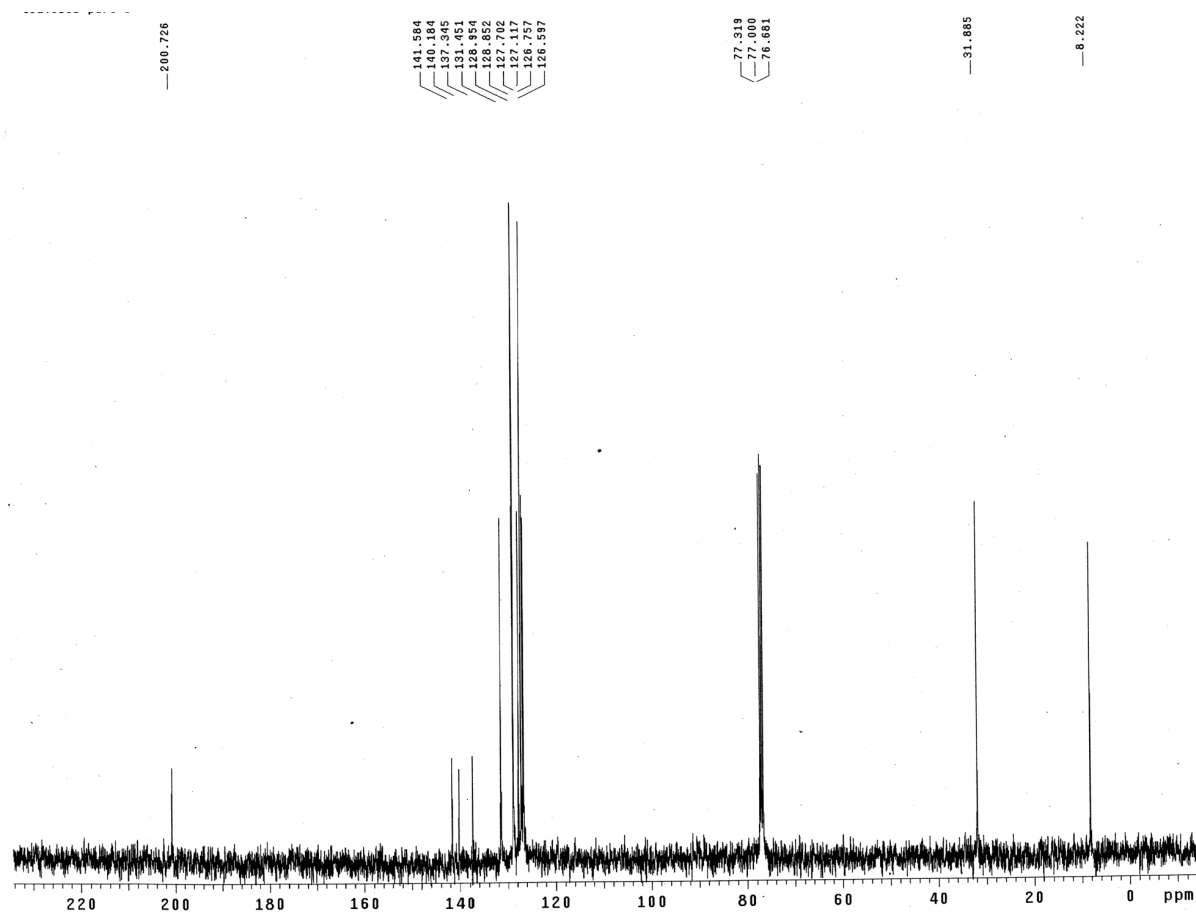

Figure S28: <sup>13</sup>C NMR spectrum of 3'-phenylpropiphenone (**6ea**) in CDCl<sub>3</sub>.

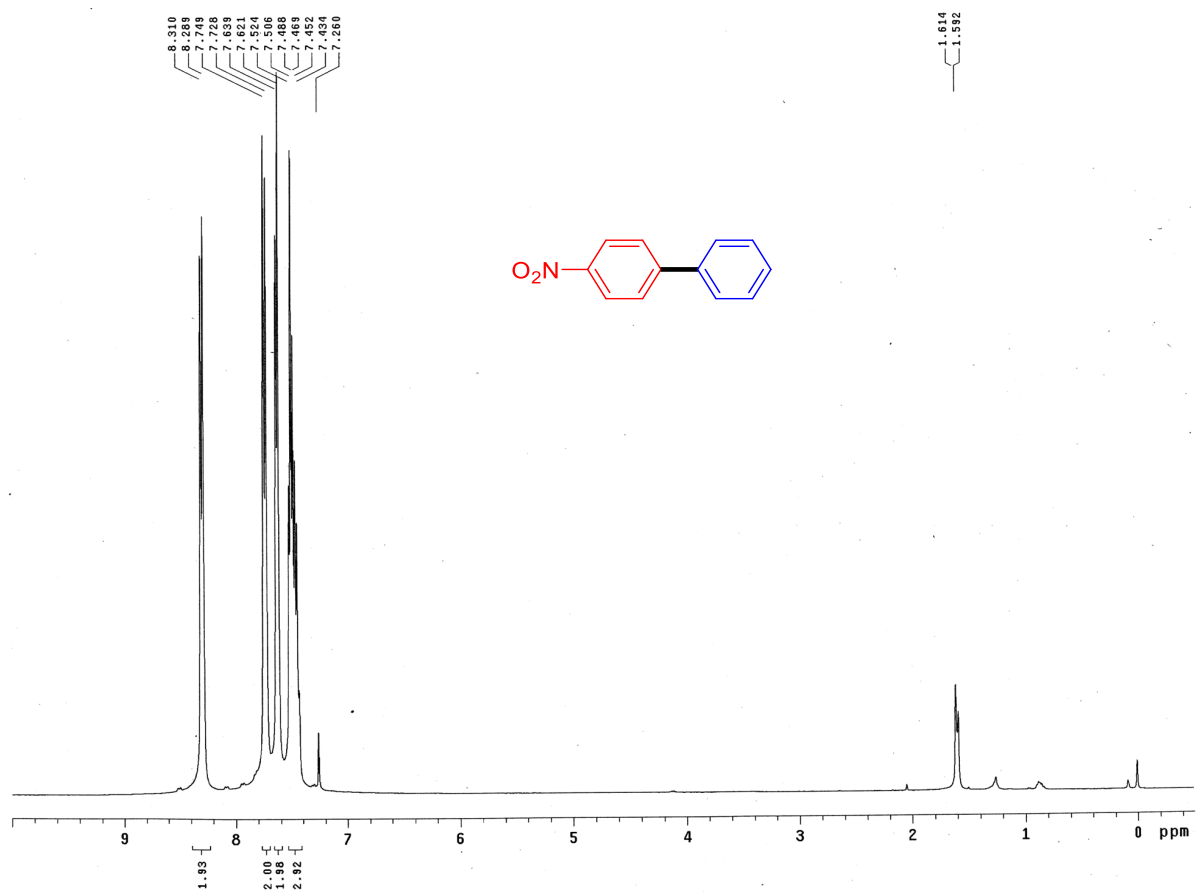

Figure S29: <sup>1</sup>H NMR spectrum of 4-nitrobiphenyl (**6fa**) in CDCl<sub>3</sub>.

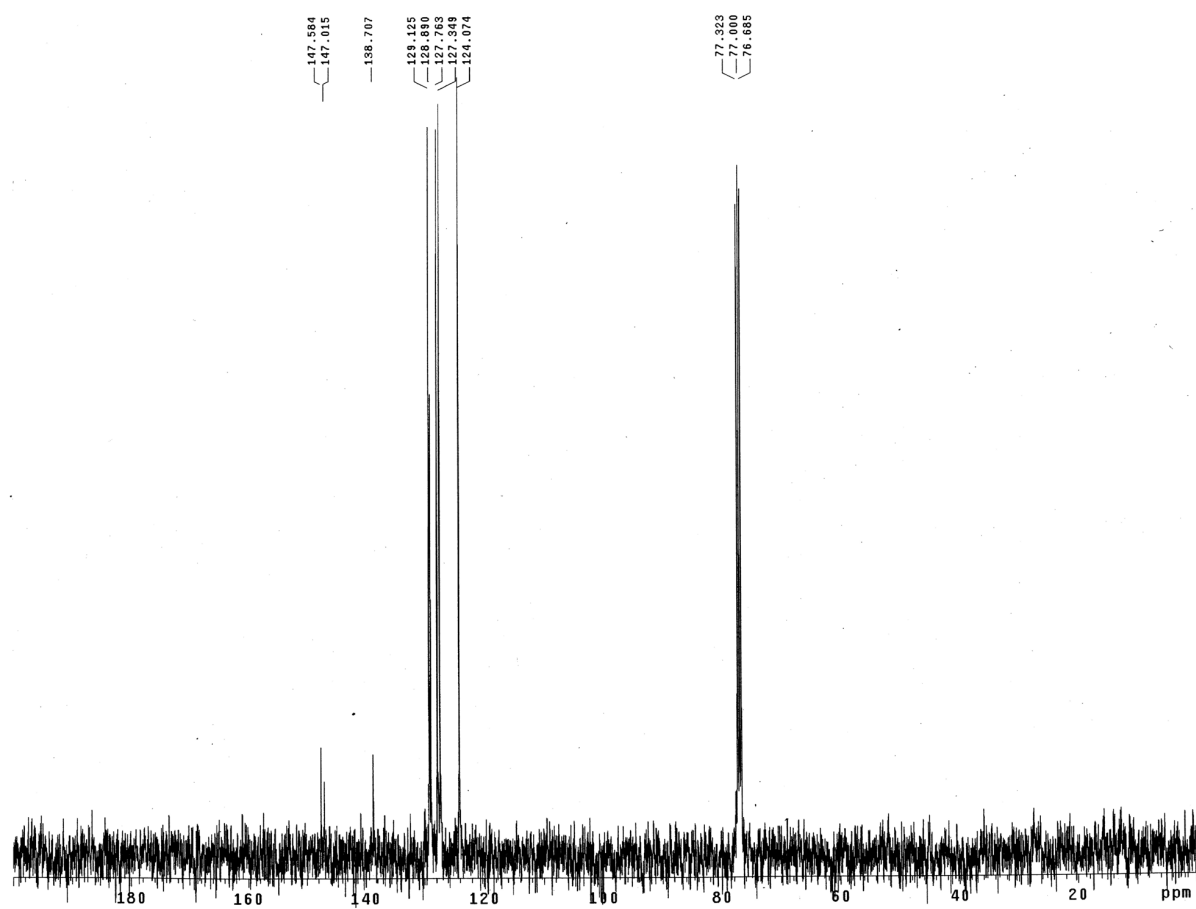

Figure S30: <sup>13</sup>C NMR spectrum of 4-nitrobiphenyl (**6fa**) in CDCl<sub>3</sub>.

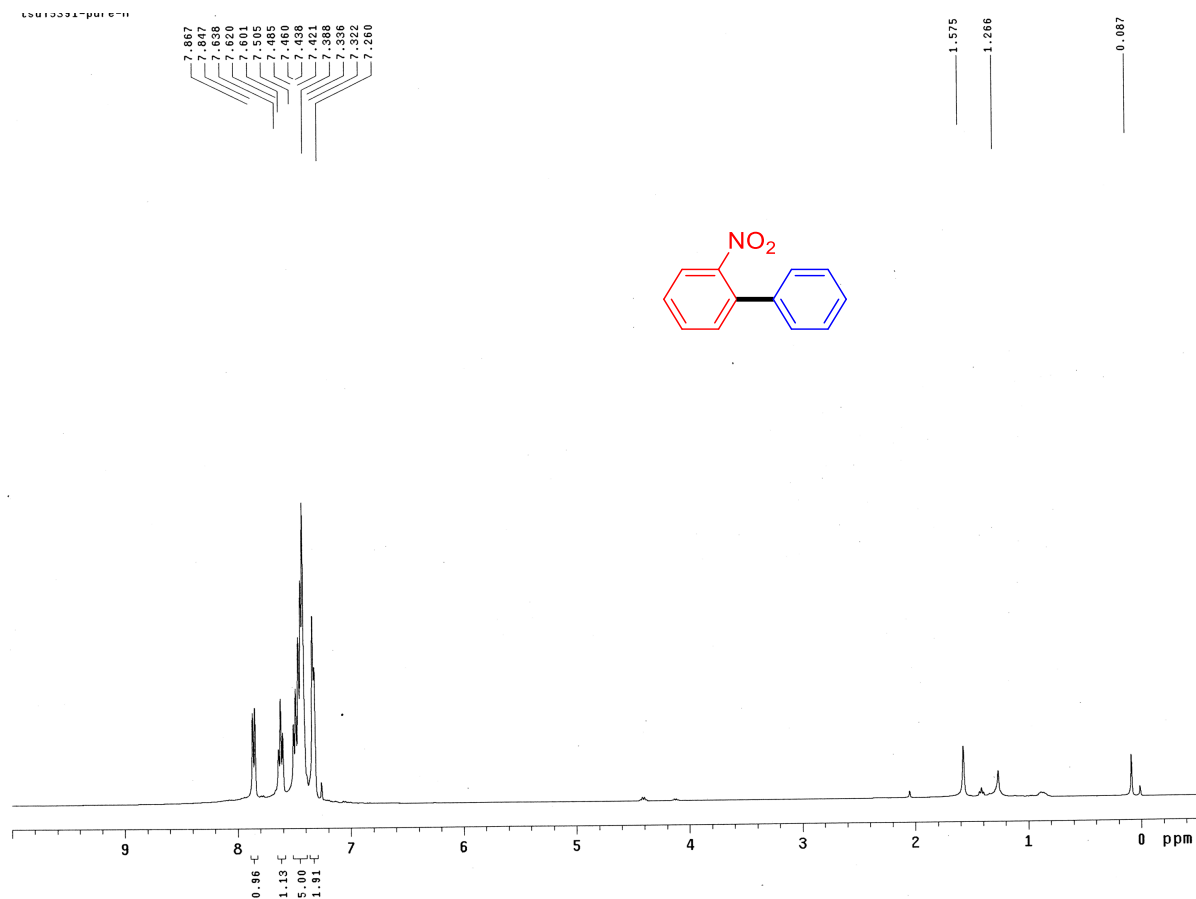

Figure S31: <sup>1</sup>H NMR spectrum of 2-nitrobiphenyl (**6ga**) in CDCl<sub>3</sub>.

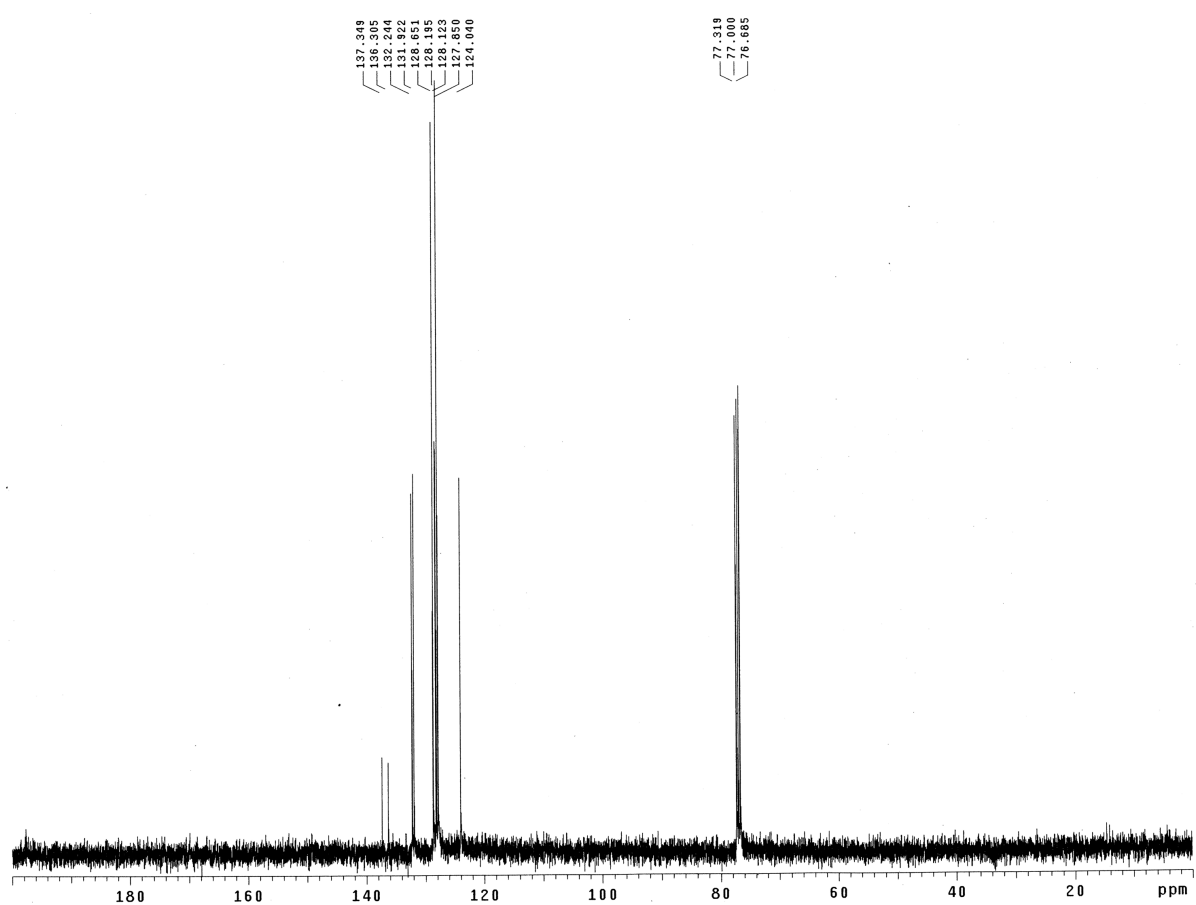

Figure S32: <sup>13</sup>C NMR spectrum of 2-nitrobiphenyl (**6ga**) in CDCl<sub>3</sub>.

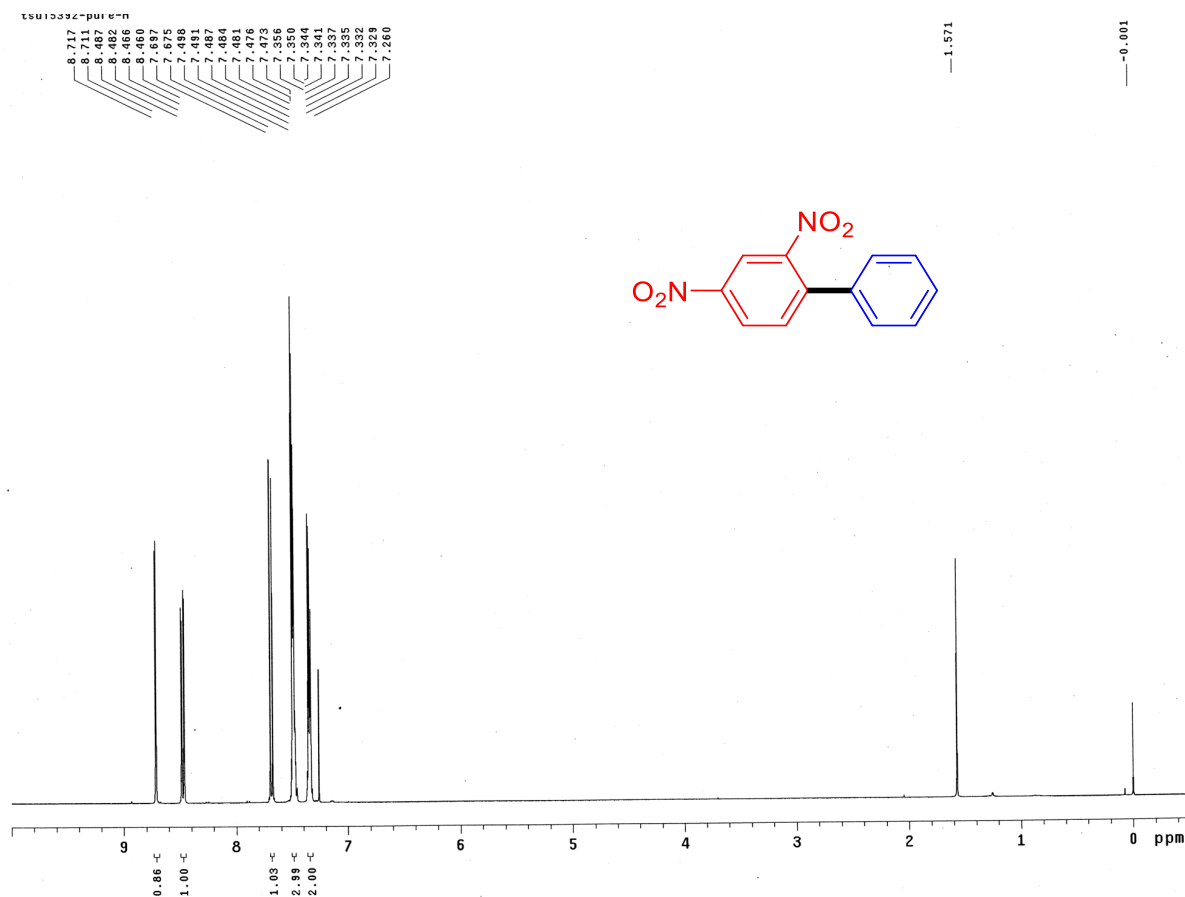

Figure S33: <sup>1</sup>H NMR spectrum of 2,4-dinitrobiphenyl (**6ha**) in CDCl<sub>3</sub>.

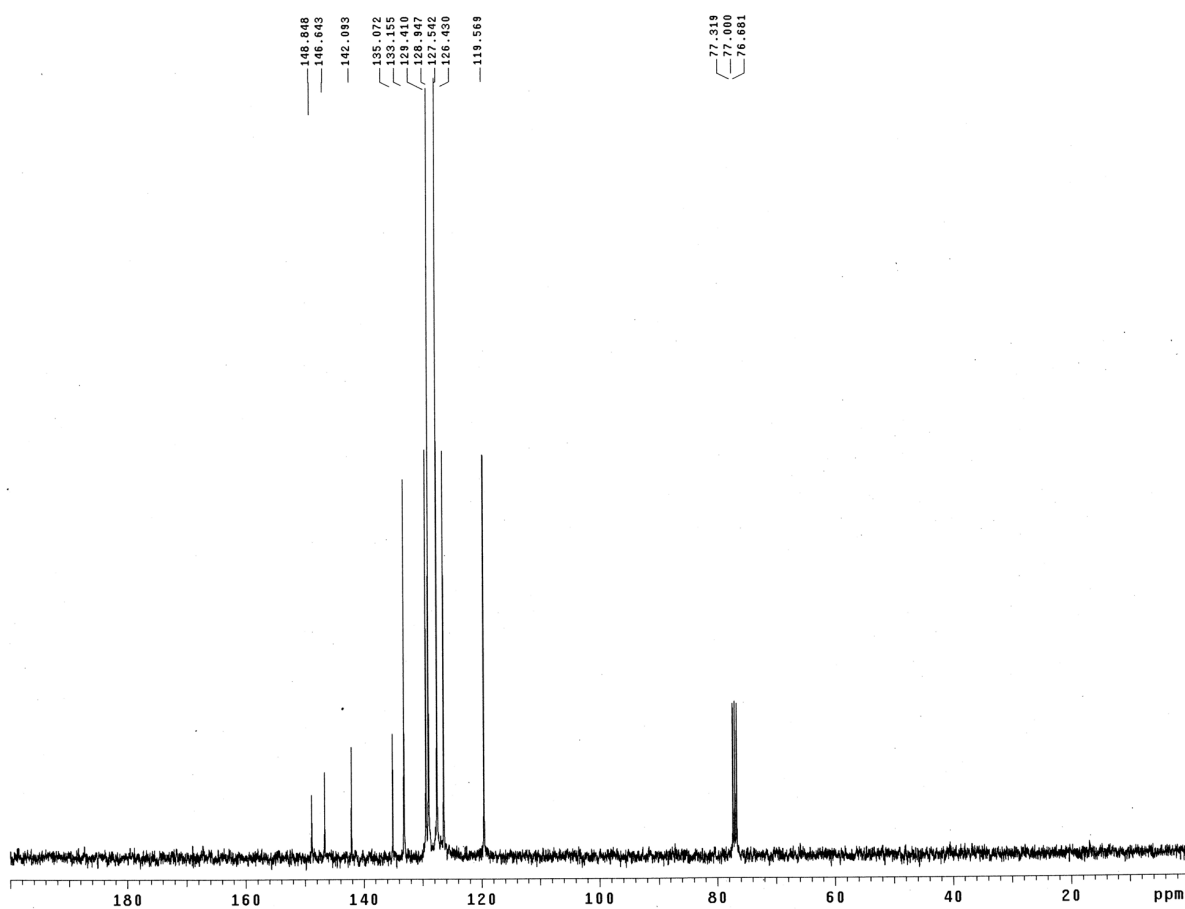

Figure S34: <sup>13</sup>C NMR spectrum of 2,4-dinitrobiphenyl (**6ha**) in CDCl<sub>3</sub>.

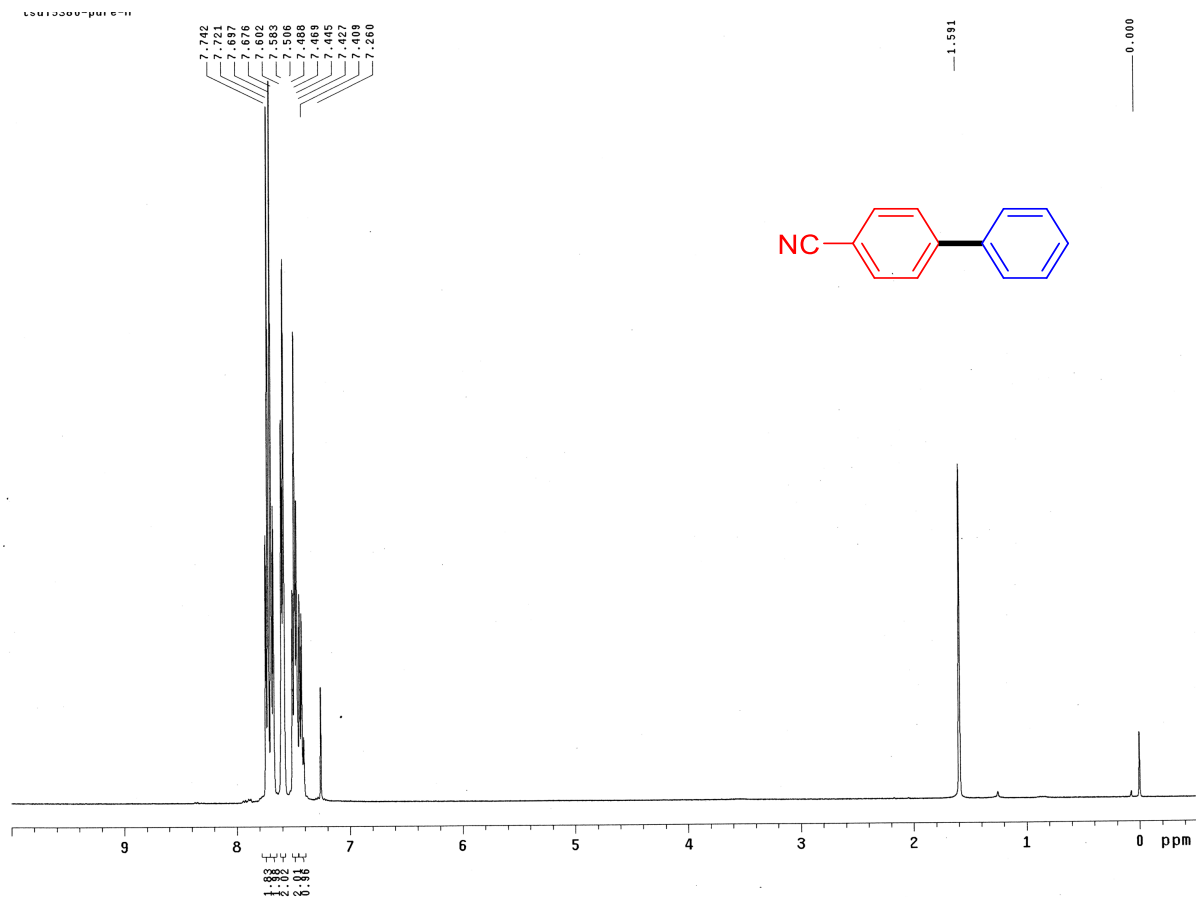

Figure S35: <sup>1</sup>H NMR spectrum of 4-cyanobiphenyl (**6ia**) in CDCl<sub>3</sub>.

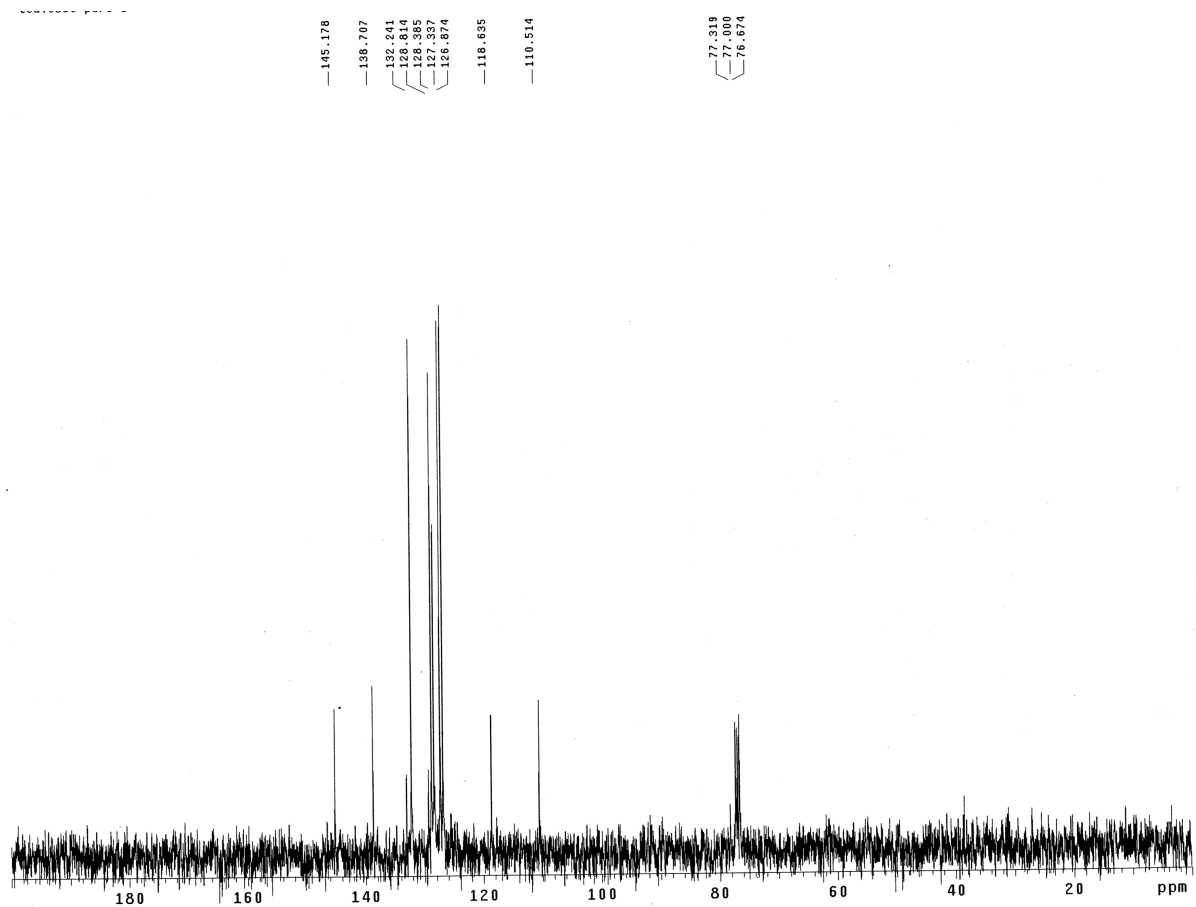

Figure S36: <sup>13</sup>C NMR spectrum of 4-cyanobiphenyl (**6ia**) in CDCl<sub>3</sub>.

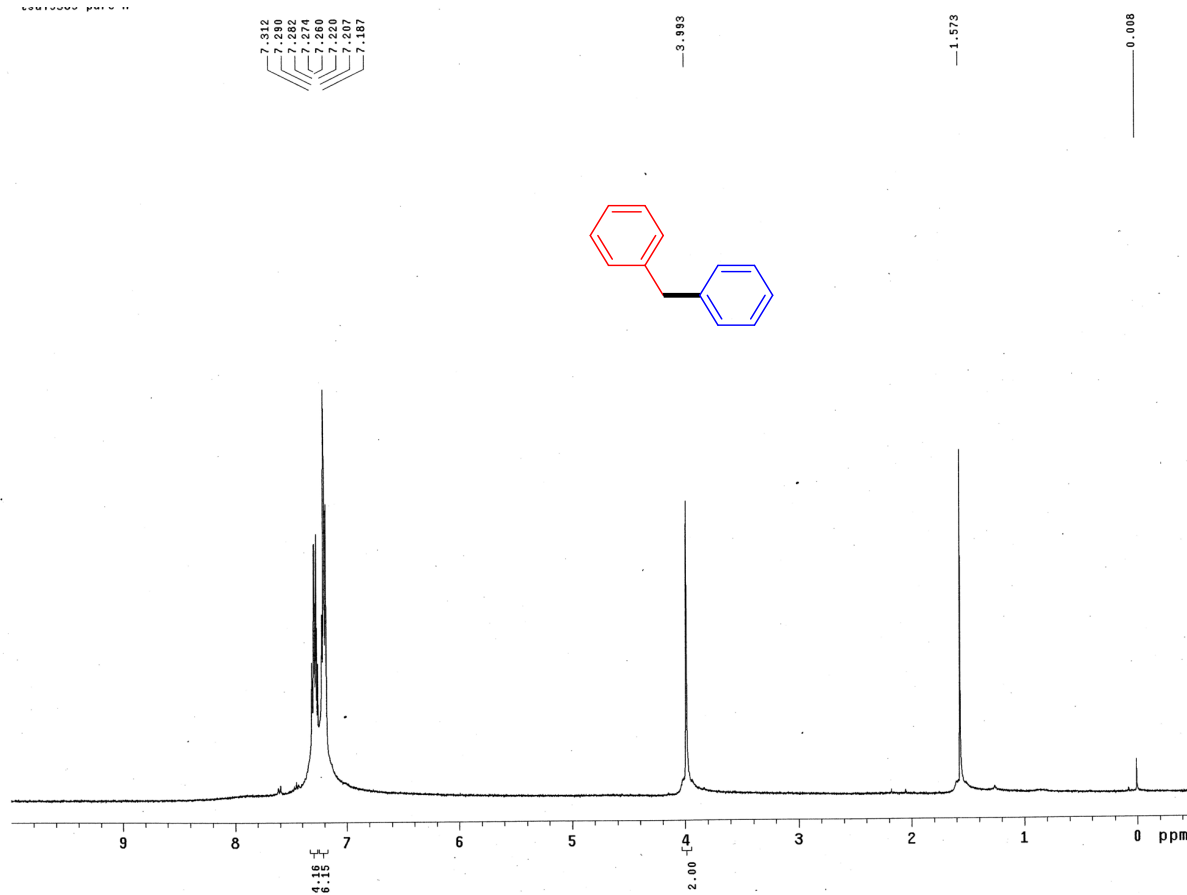

Figure S37: <sup>1</sup>H NMR spectrum of diphenylmethane (**6ja**) in CDCl<sub>3</sub>.

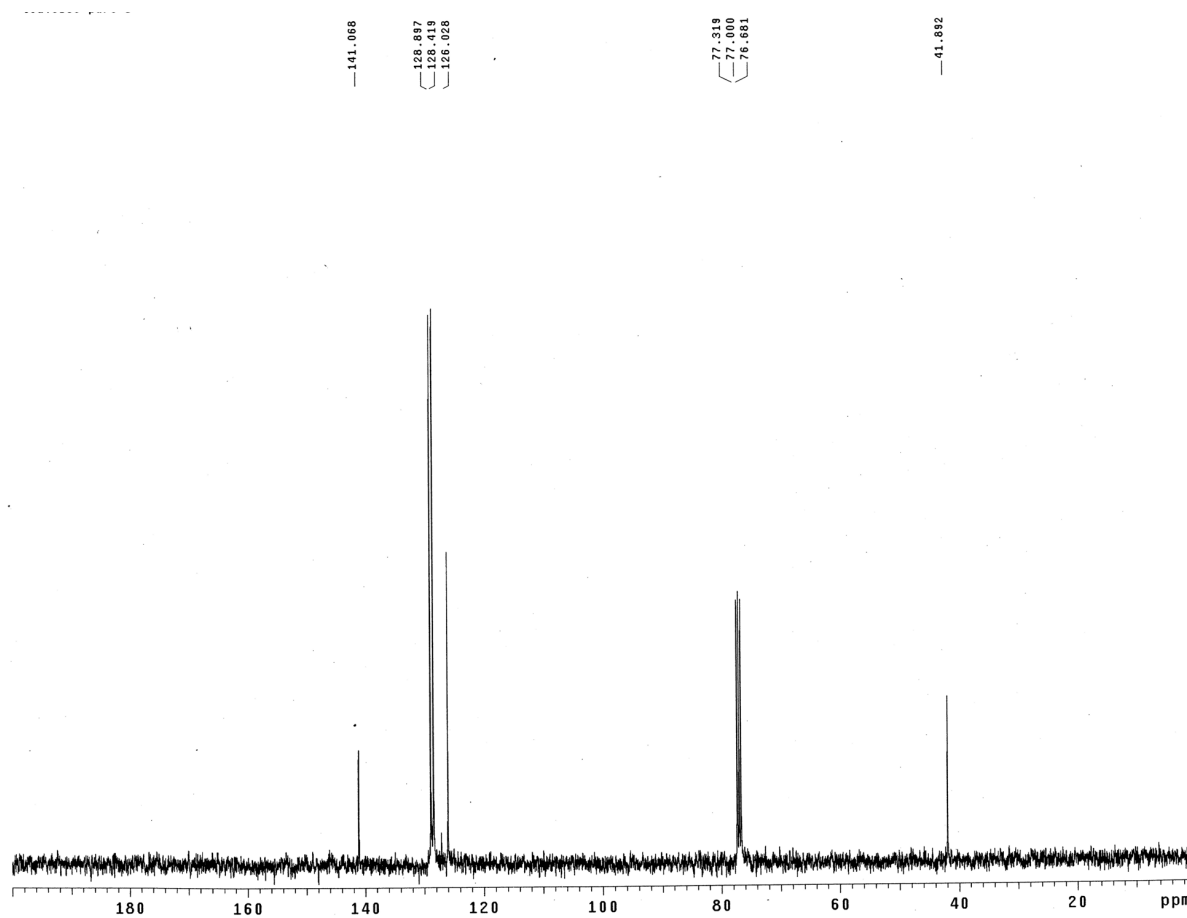

Figure S38: <sup>13</sup>C NMR spectrum of diphenylmethane (**6ja**) in CDCl<sub>3</sub>.



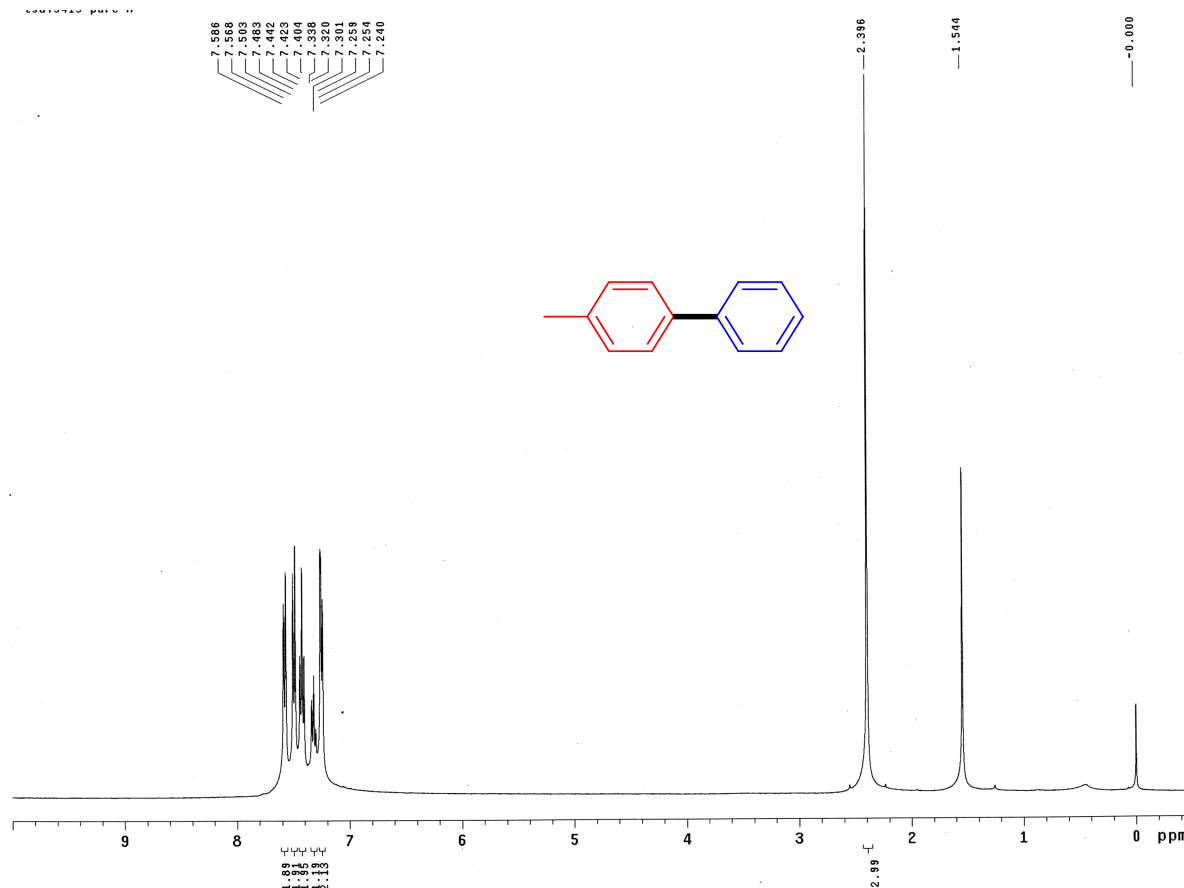

Figure S39: <sup>1</sup>H NMR spectrum of 4-methylbiphenyl (**6ka**) in CDCl<sub>3</sub>.

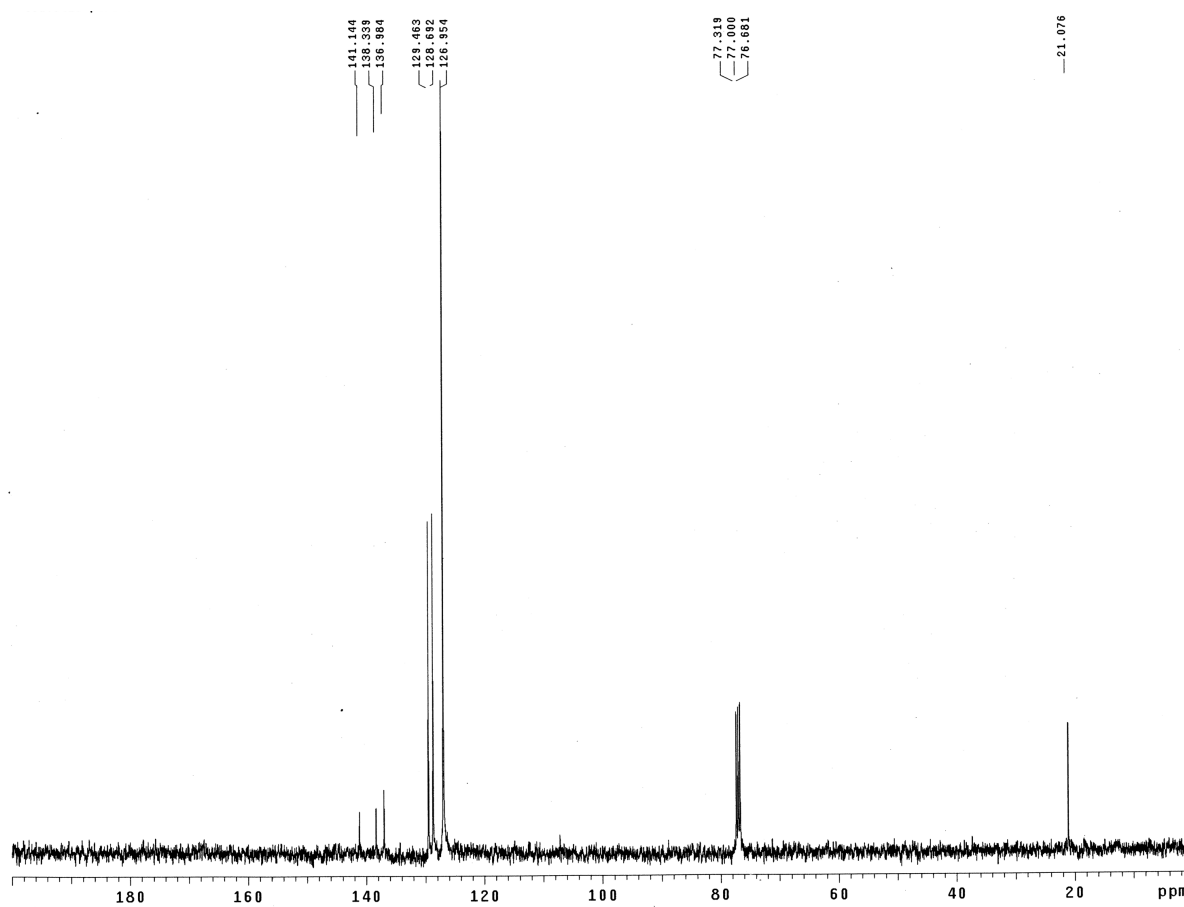

Figure S40: <sup>13</sup>C NMR spectrum of 4-methylbiphenyl (**6ka**) in CDCl<sub>3</sub>.

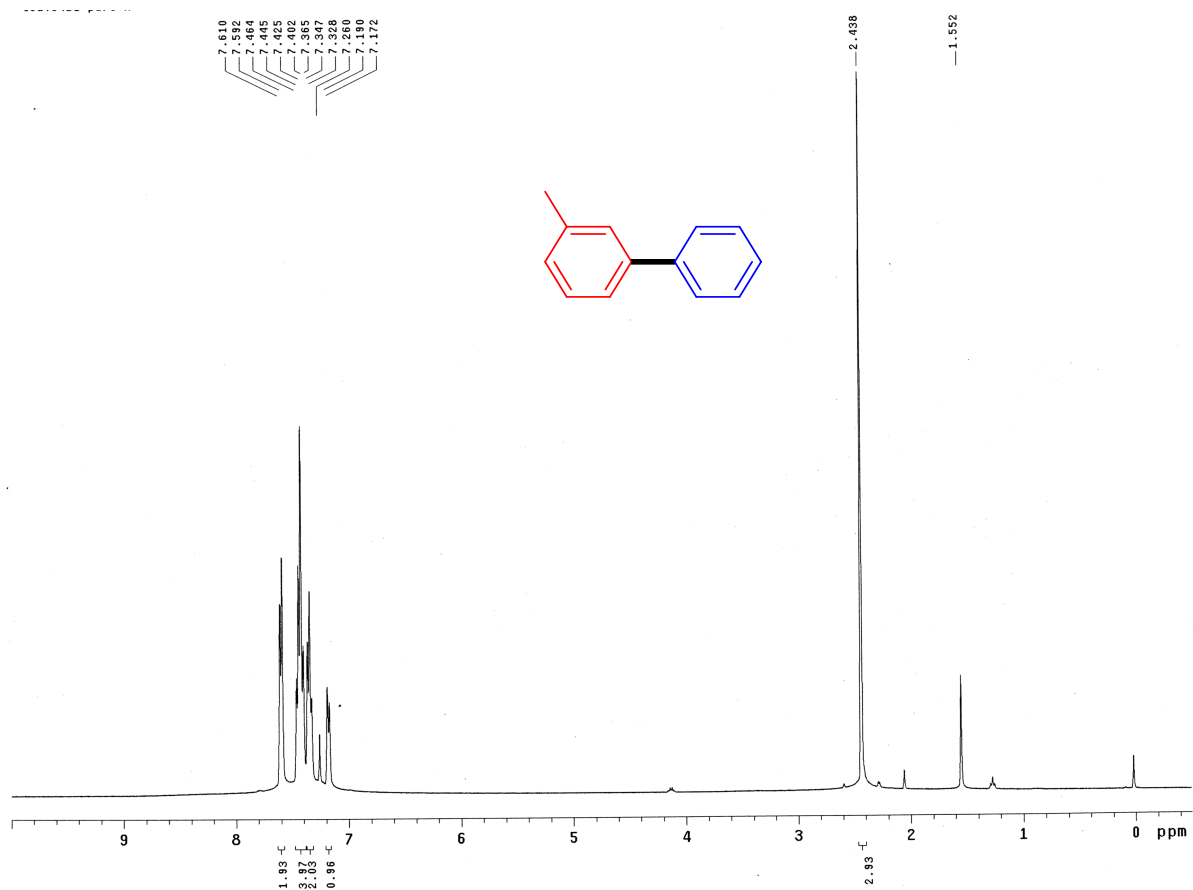

Figure S41: <sup>1</sup>H NMR spectrum of 3-methylbiphenyl (**6la**) in CDCl<sub>3</sub>.

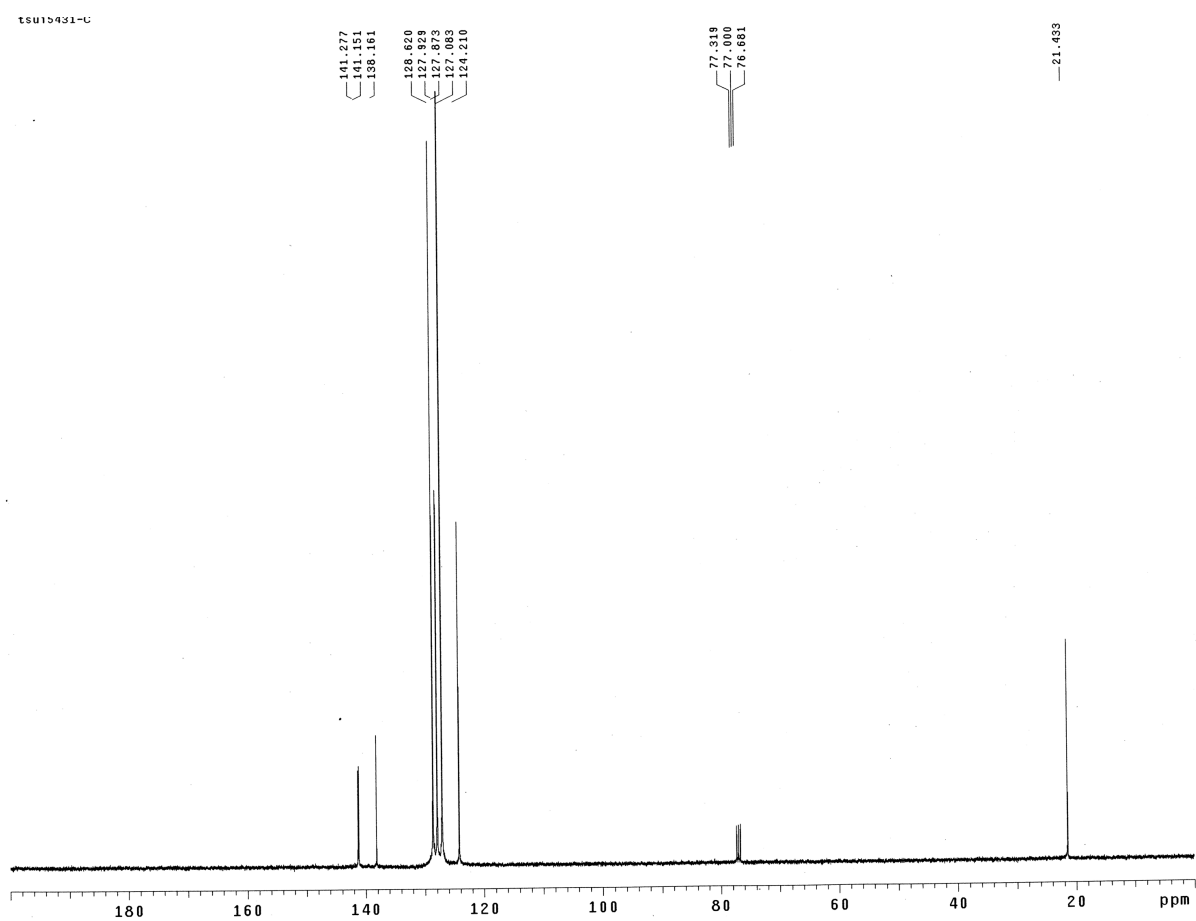

Figure S42: <sup>13</sup>C NMR spectrum of 3-methylbiphenyl (**6la**) in CDCl<sub>3</sub>.

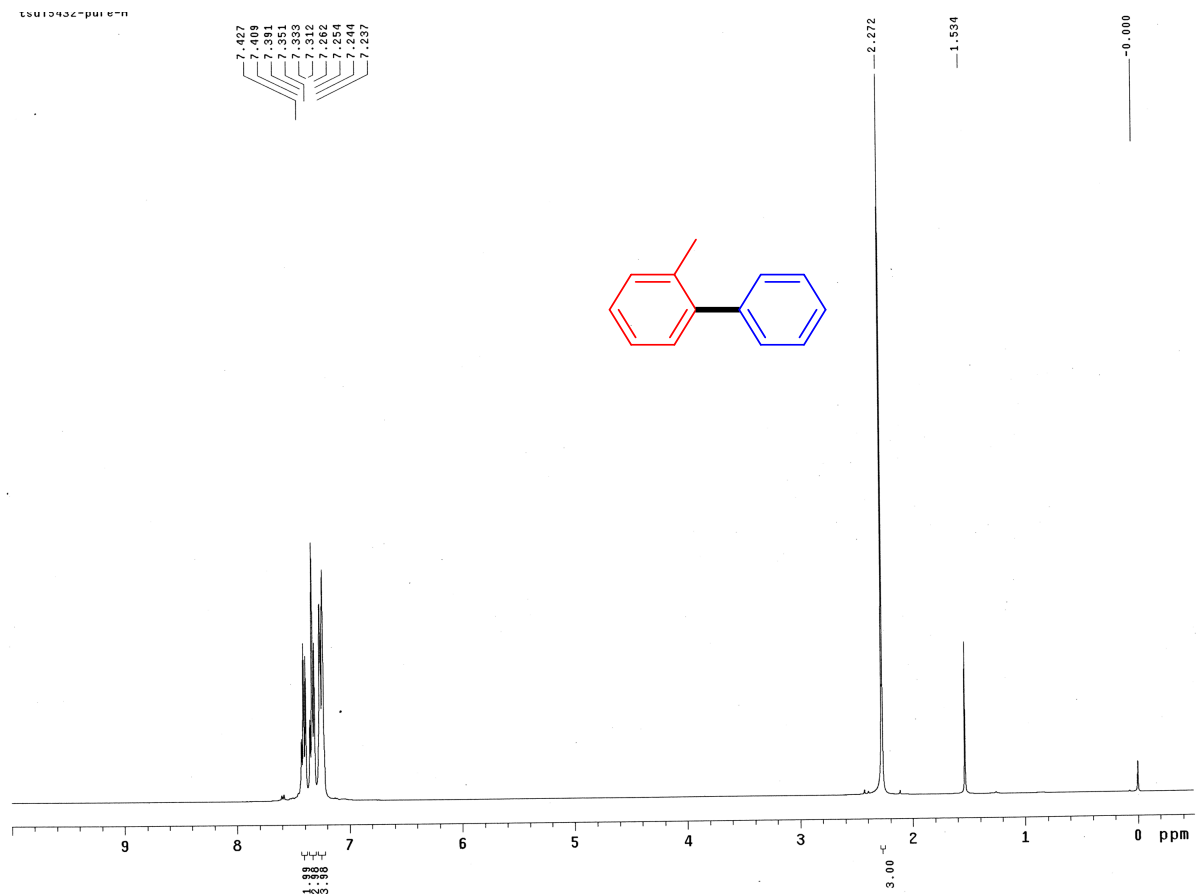

Figure S43: <sup>1</sup>H NMR spectrum of 2-methylbiphenyl (**6ma**) in CDCl<sub>3</sub>.

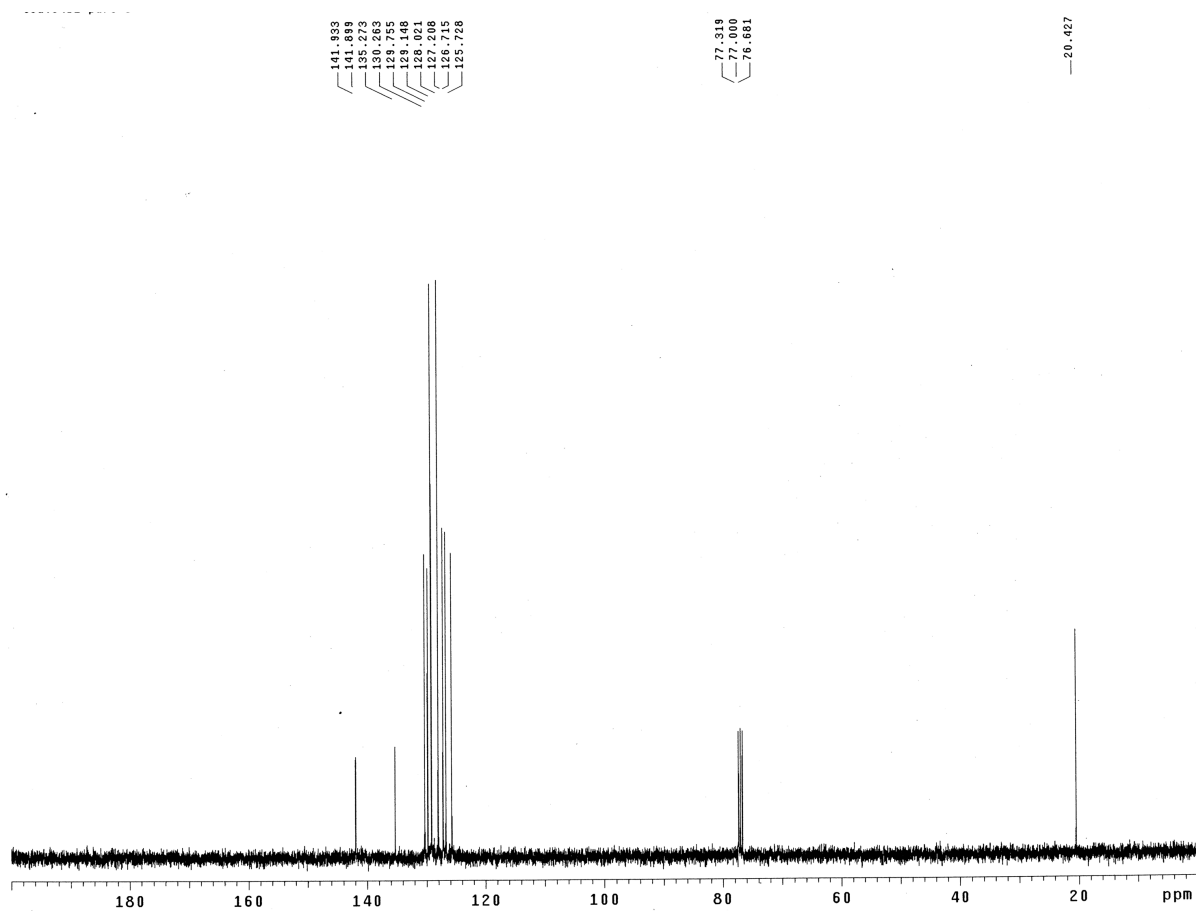

Figure S44: <sup>13</sup>C NMR spectrum of 2-methylbiphenyl (**6ma**) in CDCl<sub>3</sub>.

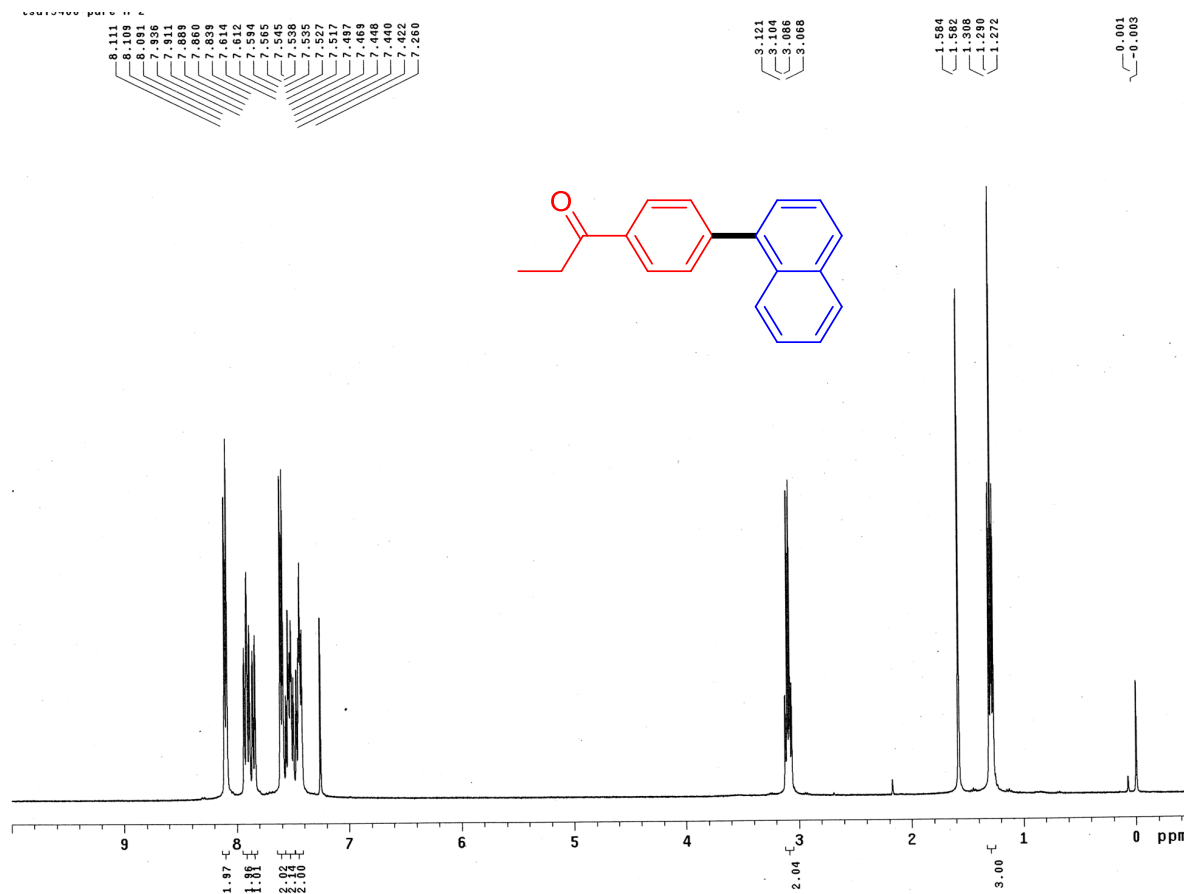

Figure S45: <sup>1</sup>H NMR spectrum of 1-(4-(naphthalen-1-yl)phenyl)propan-1-one (**6db**) in CDCl<sub>3</sub>.

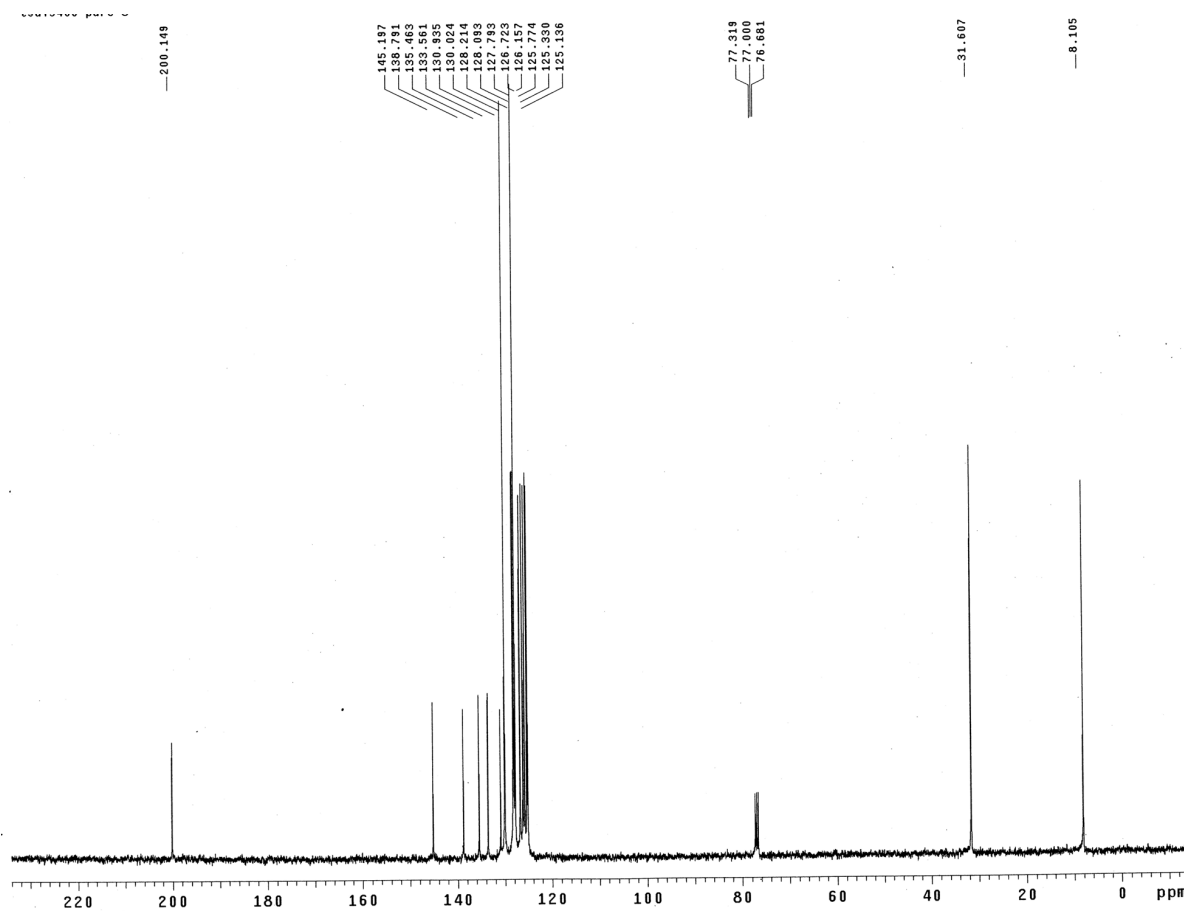

Figure S46: <sup>13</sup>C NMR spectrum of 1-(4-(naphthalen-1-yl)phenyl)propan-1-one (**6db**) in CDCl<sub>3</sub>.

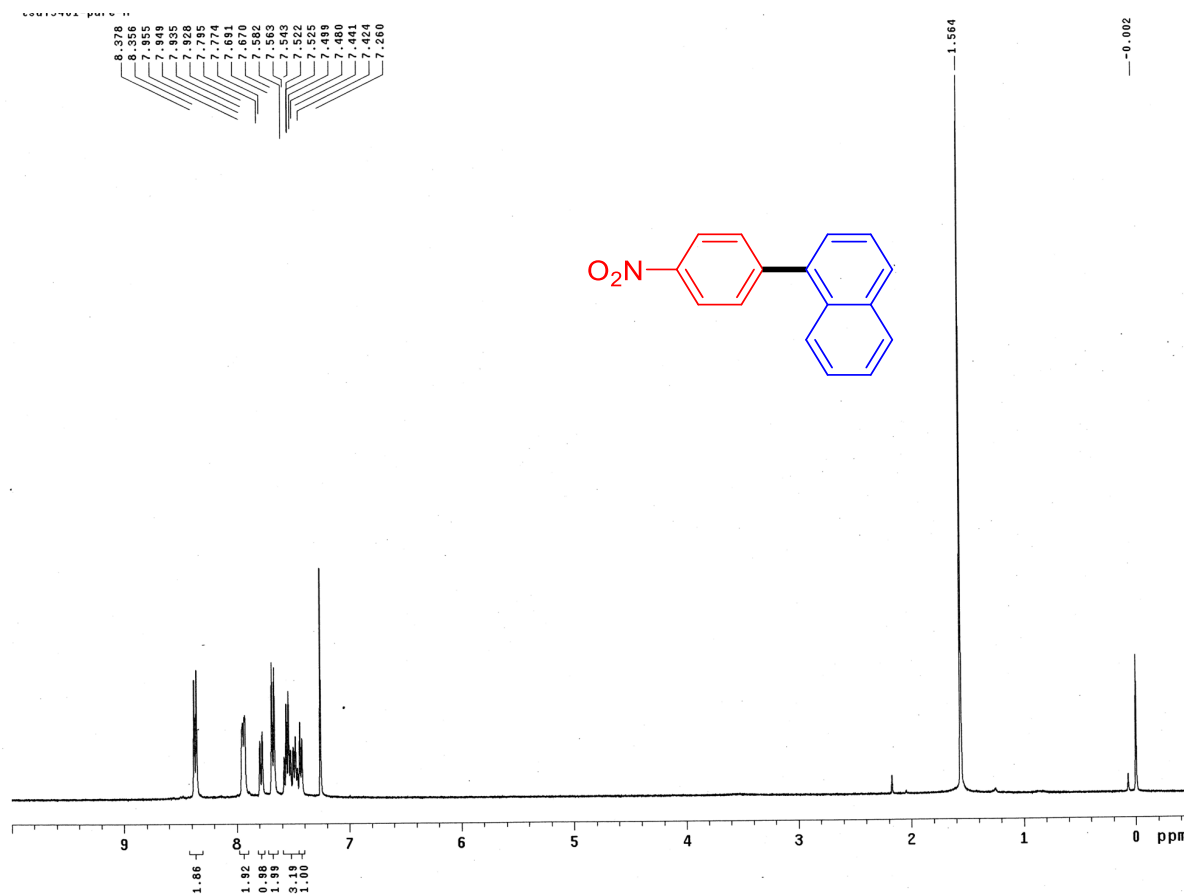

Figure S47: <sup>1</sup>H NMR spectrum of 1-(4-nitrophenyl)naphthalene (**6fb**) in CDCl<sub>3</sub>.

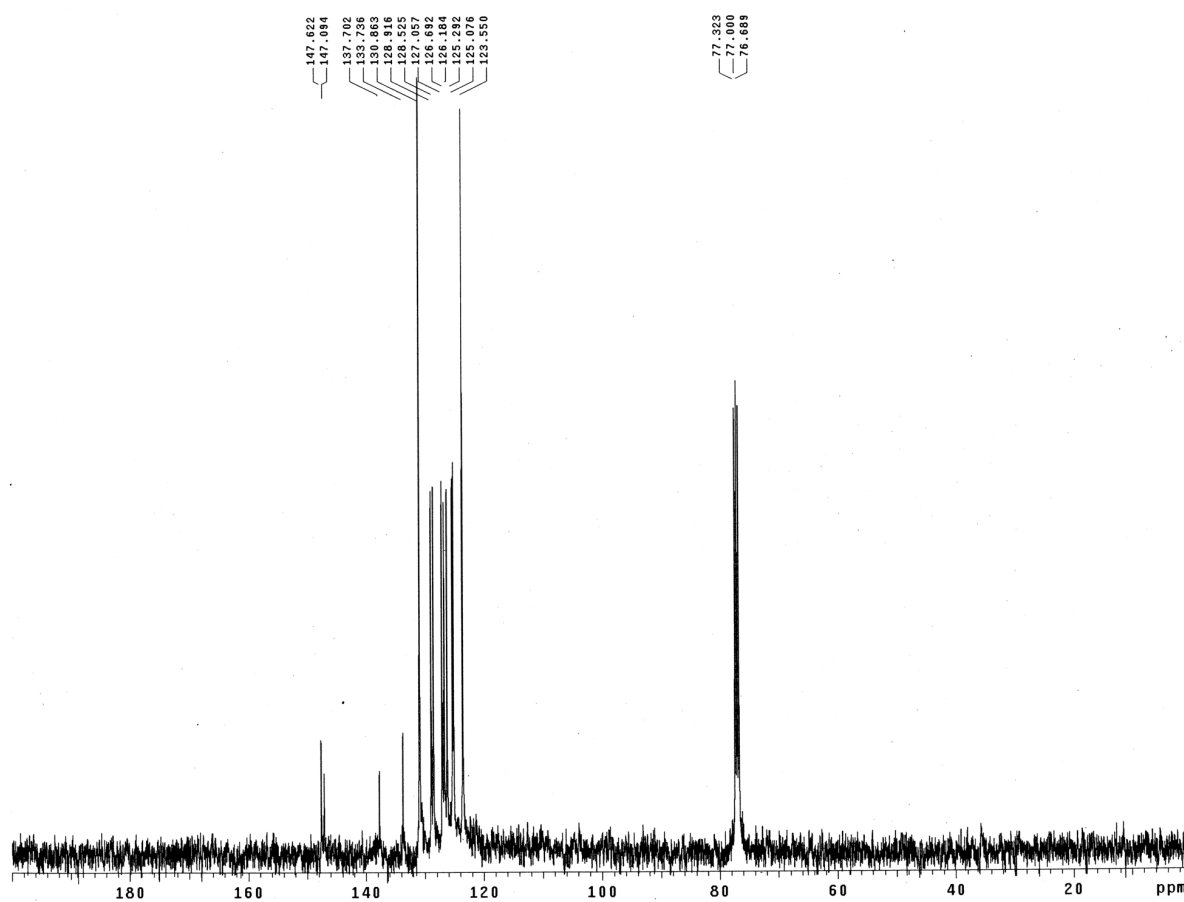

Figure S48: <sup>13</sup>C NMR spectrum of 1-(4-nitrophenyl)naphthalene (**6fb**) in CDCl<sub>3</sub>.

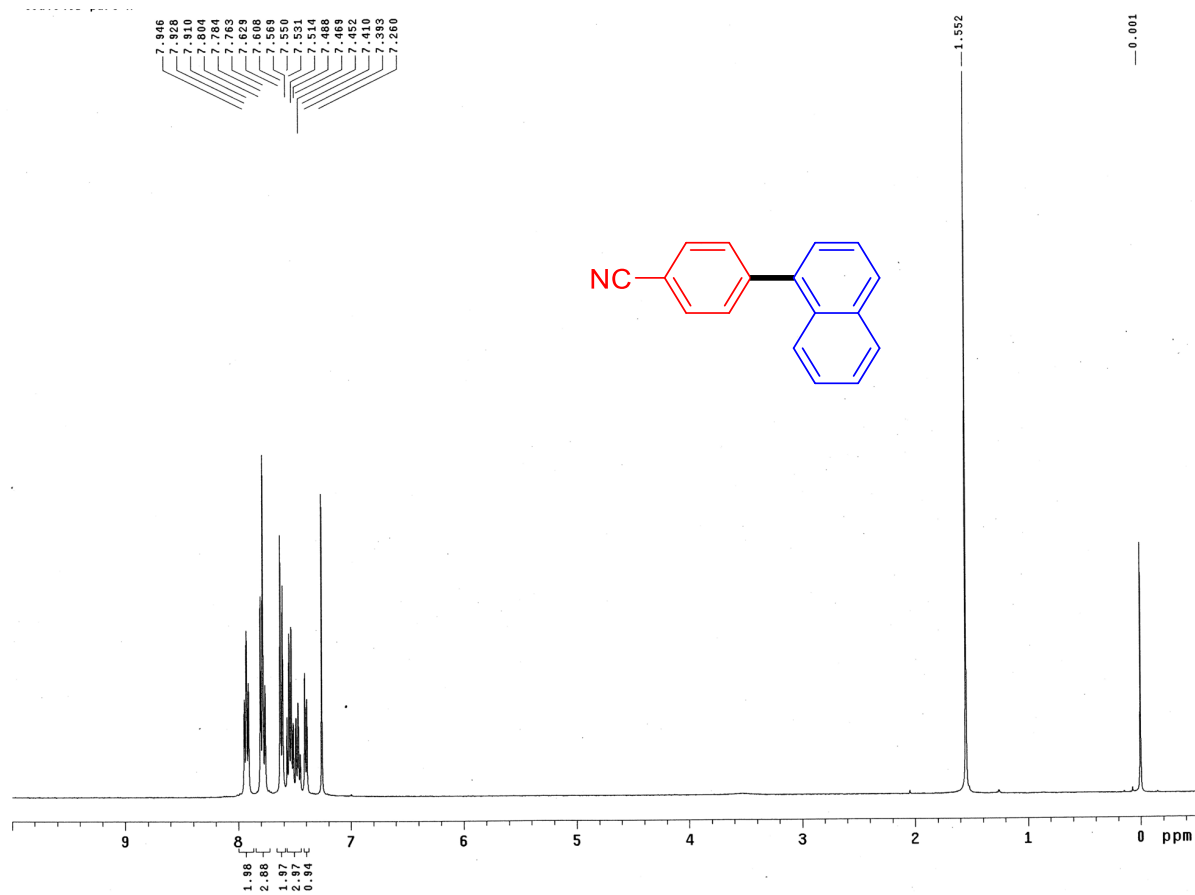

Figure S49: <sup>1</sup>H NMR spectrum of 4-(1-naphthyl)benzonitrile (**6ib**) in CDCl<sub>3</sub>.

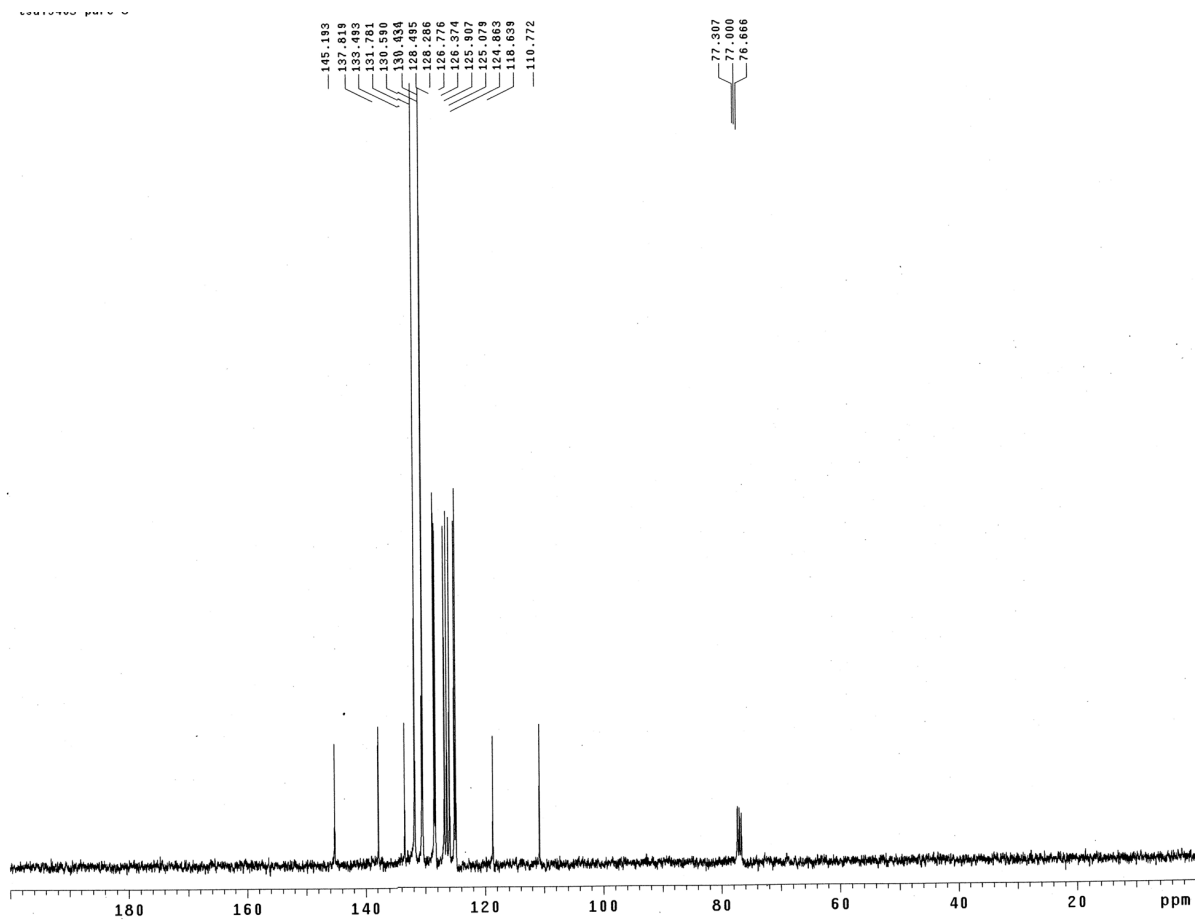

Figure S50: <sup>13</sup>C NMR spectrum of 4-(1-naphthyl)benzonitrile (**6ib**) in CDCl<sub>3</sub>.

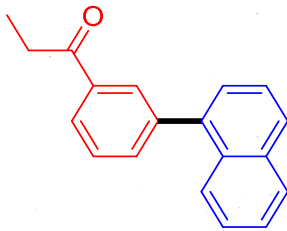

13C NMR spectrum (CDCl<sub>3</sub>) of compound 10a. The x-axis represents chemical shift in ppm, ranging from 0 to 220. The spectrum shows several sharp peaks. A peak at 200.081 ppm is labeled. A cluster of peaks between 125 and 141 ppm is labeled with values: 140.719, 138.787, 136.662, 134.028, 133.463, 132.552, 129.170, 128.218, 128.100, 127.785, 126.730, 126.499, 125.813, 125.602, 125.170, and 125.041. A peak at 77.323 ppm is labeled, with a solvent peak at 76.681 ppm indicated by a bracket. A peak at 31.509 ppm is labeled. A peak at 7.892 ppm is labeled. The chemical structure of 10a is shown in the top right corner.

Figure S52:  $^{13}\text{C}$  NMR spectrum of 1-(3-(naphthalen-1-yl)phenyl)propan-1-one (**6e**) in  $\text{CDCl}_3$ .

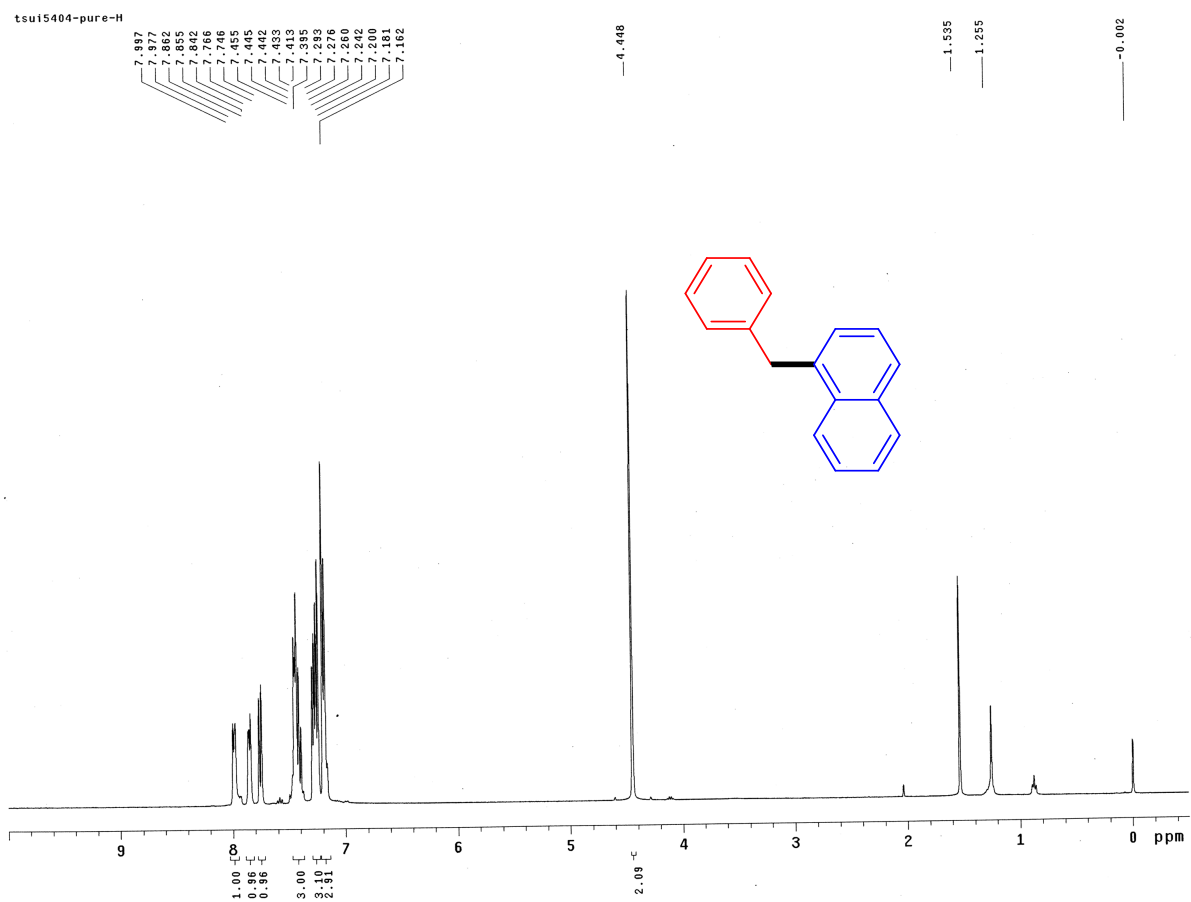

Figure S53: <sup>1</sup>H NMR spectrum of 1-benzyl-naphthalene (**6jb**) in CDCl<sub>3</sub>.

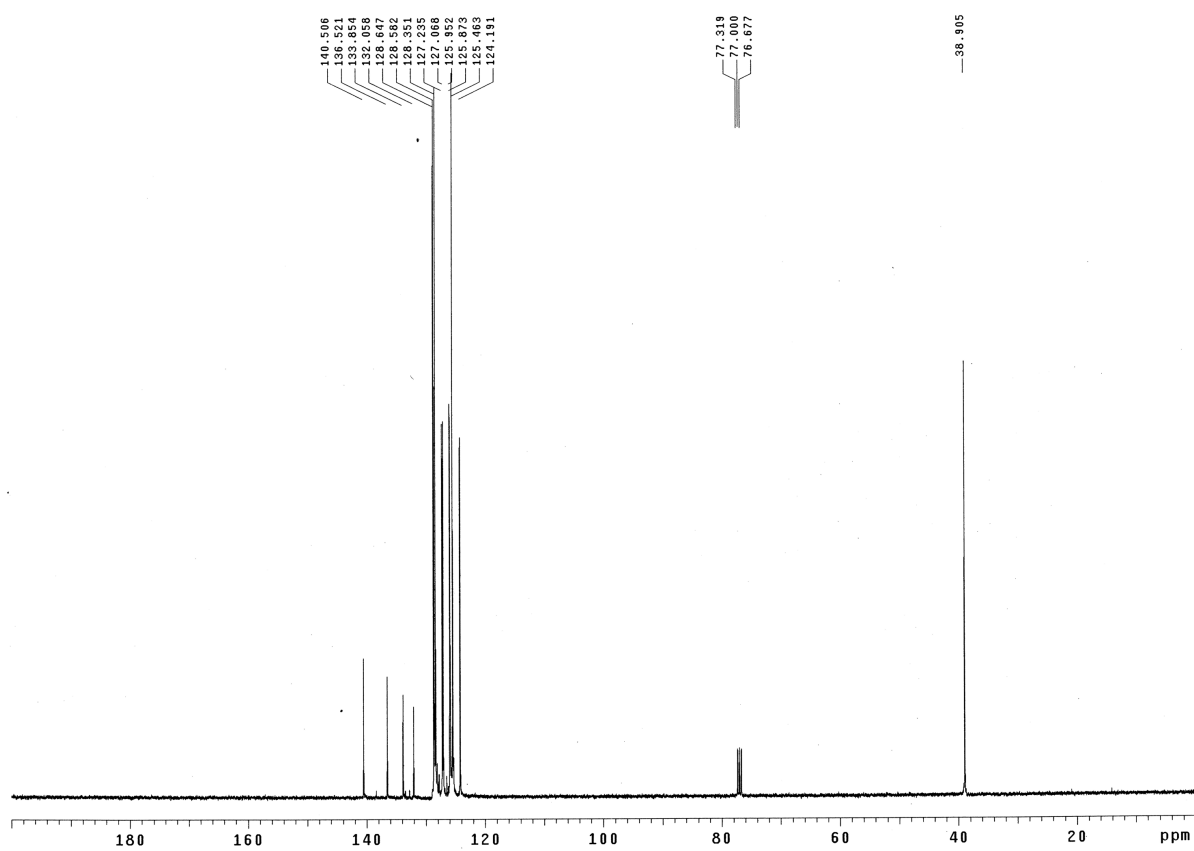

Figure S54: <sup>13</sup>C NMR spectrum of 1-benzyl-naphthalene (**6jb**) in CDCl<sub>3</sub>.



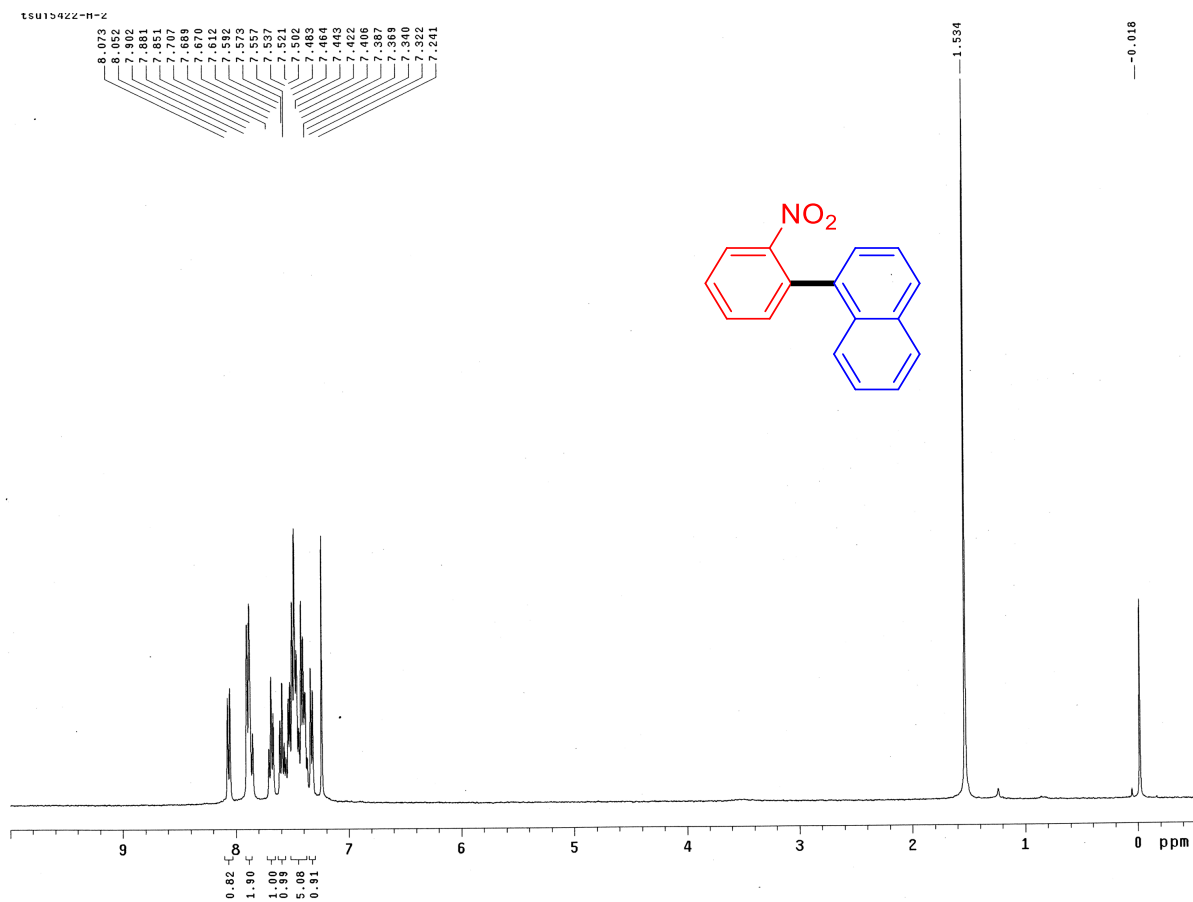

Figure S55: <sup>1</sup>H NMR spectrum of 1-(2-nitrophenyl)naphthalene (**6gb**) in CDCl<sub>3</sub>.

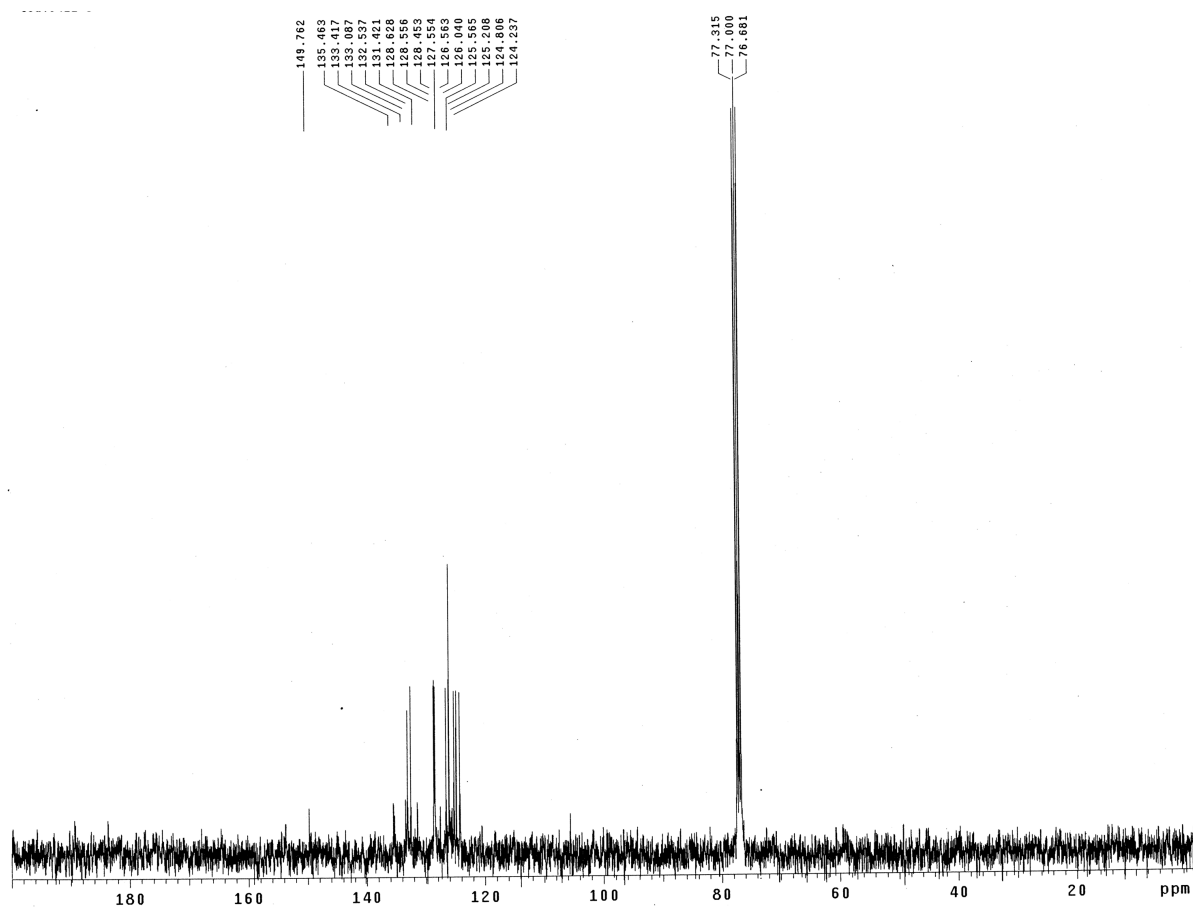

Figure S56: <sup>13</sup>C NMR spectrum of 1-(2-nitrophenyl)naphthalene (**6gb**) in CDCl<sub>3</sub>.
